# Supplementary material for: Effectiveness evaluation of temporary emission control action in 2016 winter in Shijiazhuang, China
Source: Copernicus journal article supplement (doi:10.5194/acp-2017-1001), 2017-12-18
Supplement: Supplementary file [file acp-2017-1001-AC1-supplement.zip]

*Supplemental Materials for*

**Effectiveness evaluation of temporary emission control action in 2016  
winter in Shijiazhuang, China**

Baoshuang Liu<sup>a</sup>, Yuan Cheng<sup>a</sup>, Ming Zhou<sup>a</sup>, Danni Liang<sup>a</sup>, Lu Wang<sup>a</sup>, Wei Jin<sup>b</sup>, Lingzhi Zhang<sup>b</sup>,  
Yibin Ren<sup>b</sup>, Jingbo Zhou<sup>b</sup>, Chunling Dai<sup>b</sup>, Jiao Xu<sup>a</sup>, Yinchang Feng<sup>a\*</sup>, and Yufen Zhang<sup>a\*</sup>

<sup>a</sup> State Environmental Protection Key Laboratory of Urban Ambient Air Particulate Matter  
Pollution Prevention and Control, College of Environmental Science and Engineering, Nankai  
University, Tianjin, 300071, China

<sup>b</sup> Shijiazhuang Environmental Monitoring Station, Shijiazhuang, 050023, China

---

\* Tel./fax: +86 02285358792.

E-mail address: fengyc@nankai.edu.cn (Y.C. Feng) and zhafox@126.com (Y.F. Zhang)

## **The measurement of the height of mixed layer**

The height of mixed layer was measured at an atmospheric gradient monitoring station of Shijiazhuang with a lidar scanner (AGHJ-I-LIDAR (HPL)). The lidar scanner use 532-nm linearly polarized laser to accomplish the remote sensing detection of atmospheric particulate matters. Based on the vertical and horizontal polarization signal detection, the lidar can analyze some parameters about atmospheric layer, including atmospheric extinction coefficient, polarization ratio profile, height and optical thickness of mixed layer and so on. And then, information about temporal and spatial distribution-characteristics of atmospheric particulates, the spatial and temporal variations of atmospheric pollution layer, the transmission and deposition of particulate pollution can be obtained.

## **Control measures during the TECA period**

(1) **Reduce the usage of coal.** The generating capacity of thermal power enterprises is reduced to the utmost. Coal-fired facilities without using clean fuels are shut down, whose steaming tons are less than 20 tons and don't undertake the task of centralized heating. The non-civilian coal-fired facilities in gas-related enterprises have to be shut down.

(2) **Decrease industrial production.** Except for the enterprises that provide residential heating and ensure people's livelihood, all the industrial enterprises in the whole city which include steel, cement, coke, casting, glass, ceramics, etc. are obliged to stop production. In principle, all the production processes that can generate volatile organic compounds (VOCs) are shut down. All the gas-related enterprises that cannot meet the standard emissions must stop production.

(3) **Inhibition of dust emission.** The main urban areas of Shijiazhuang and built-up areas of county are prohibited from the building demolition, road excavation, concrete mixing and earthwork, etc. without the approval of the municipal government. All building sites are used in totally-enclosed dustproof measures. All the open-air mines, sand mining, stone processing, and sand and stone processing industry must stop production in the whole city.

(4) **Driving restriction.** Motor vehicles are restricted on the basis of odd-and-even license plate rule in urban area of Shijiazhuang, and the bus-travel is free during the sword action period. Strictly prohibited the sale of gasoline, diesel and ordinary diesel oils that don't meet the fifth stage vehicle emission standard in China

([http://www.zhb.gov.cn/gkml/hbb/bgg/201601/t20160118\\_326596.htm](http://www.zhb.gov.cn/gkml/hbb/bgg/201601/t20160118_326596.htm)). The system of staggered working hours is implemented in all the administrative departments and institutions in the whole city.

**(5) Prohibit open burning.** Crack down on these behaviors that burning straw, garbage, leaves, weeds, and burning mountain, etc. in the whole city during the control action period.

## **Data calculation and quality control**

In this paper, the monitoring sites of air quality distributed throughout the city of Shijiazhuang, which caused to the concentrations of air pollutants have large spatial-differences (Fig. 1). In addition, Shijiazhuang city experienced several heavy pollution processes during the temporary emission control action (TECA) period (Fig. 2), likely leading to the concentrations of air pollutants have larger temporal-differences. Therefore, the error bars are large in this study (as shown in Fig. 3). For the same reasons, the error bars of the chemical species in  $PM_{2.5}$  are also larger (Fig. 7).

The monitoring sites belonged to national, provincial and city controlling points (as seen in section 2.2.1 in paper), and all of them are managed in a standardized way. They all have QA/QC system. In addition, there is a strict quality control for the collection and analysis of the ambient  $PM_{2.5}$ . Therefore, the quality of the data itself is guaranteed in this study.

Here, the decreased or increased values for the air pollutants or chemical species concentrations during different control stages were calculated at each monitoring sites, and the final results were obtained from the average values of these sites, so that the uncertainty of results can be further reduced in this paper.

77  
78  
79  
80  
81

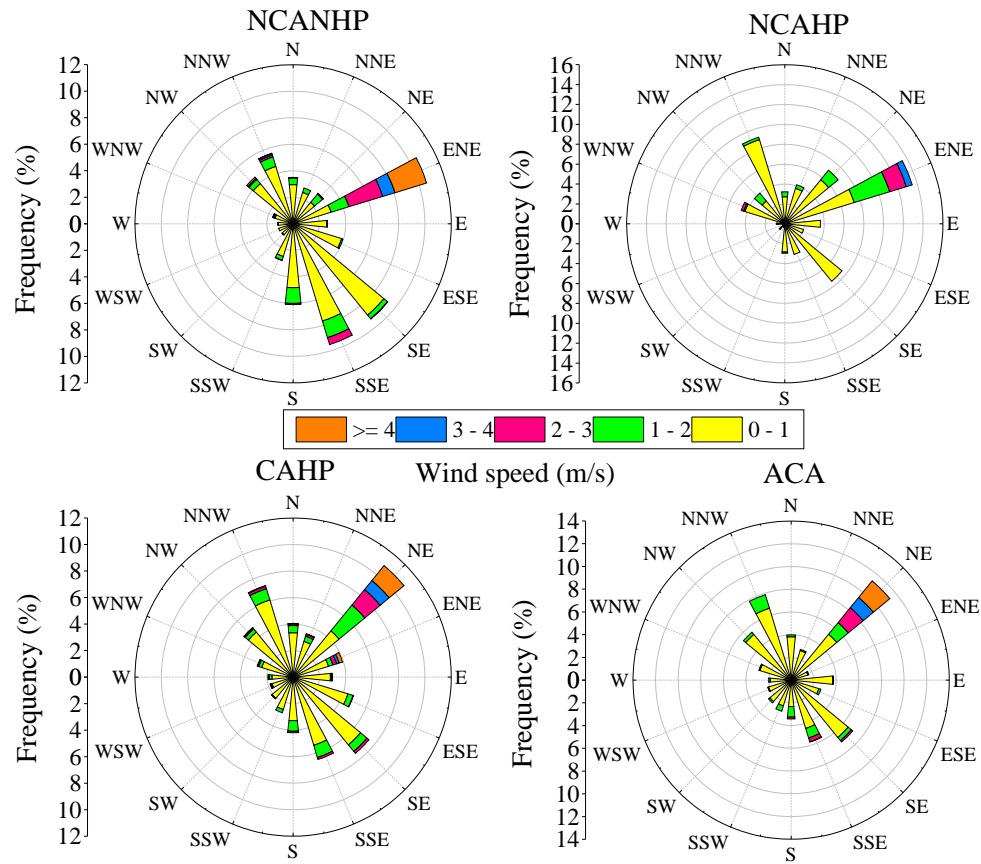

82  
83  
84  
85  
86  
87  
88  
89  
90  
91

**Fig. S1.** Rose map of wind directions and wind speeds in Shijiazhuang during the four stages of TECA period.

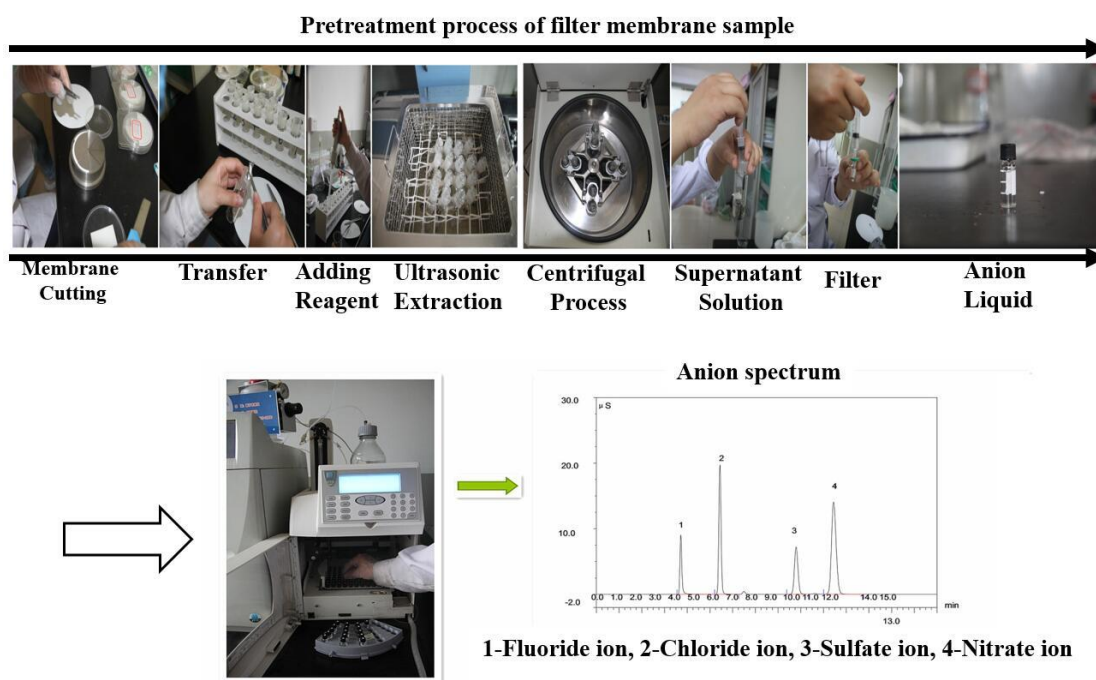

#### Determination

**Fig. S2.** The determination process of anions in the PM<sub>2.5</sub> filter membrane samples.

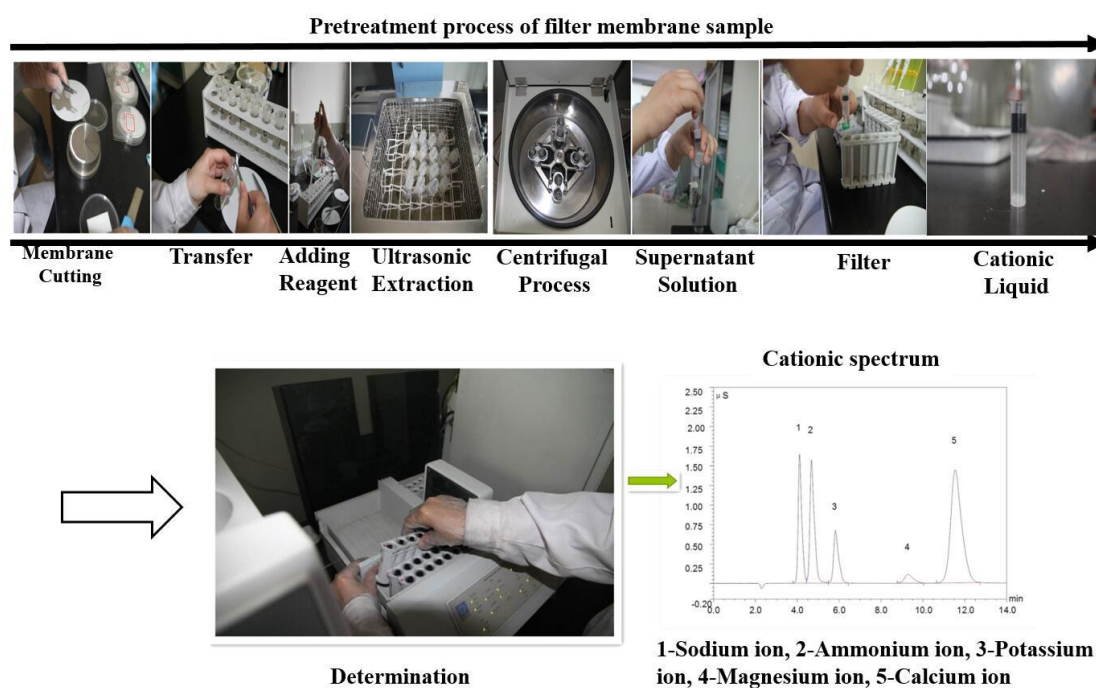

#### Determination

**Fig. S3.** The determination process of cations in the PM<sub>2.5</sub> filter membrane samples.

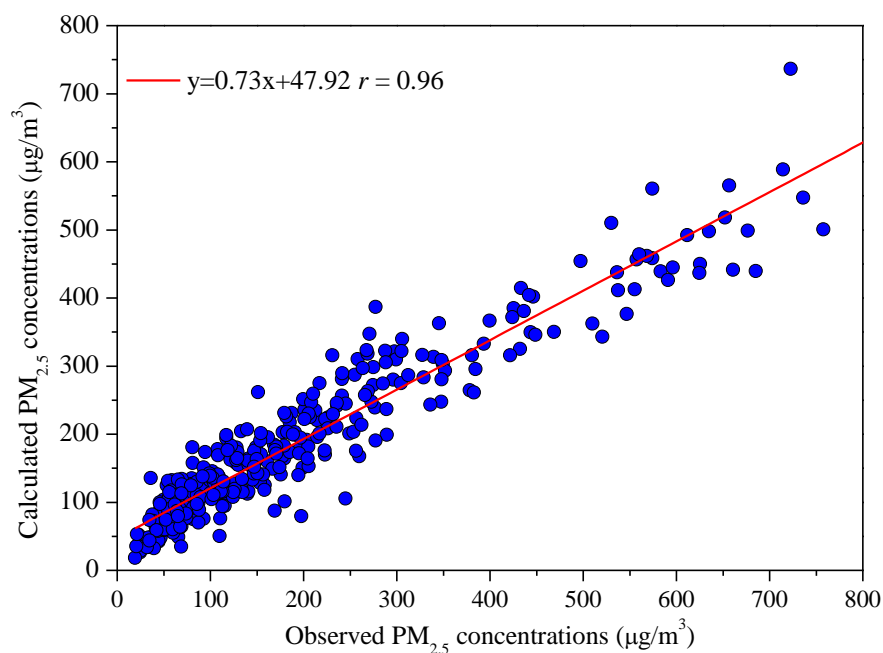

**Fig. S4.** Correlations between observed and calculated PM<sub>2.5</sub> concentrations during the whole sampling period: November 24, 2015 to January 9, 2017. Also shown are the linear regression lines with regression equations.

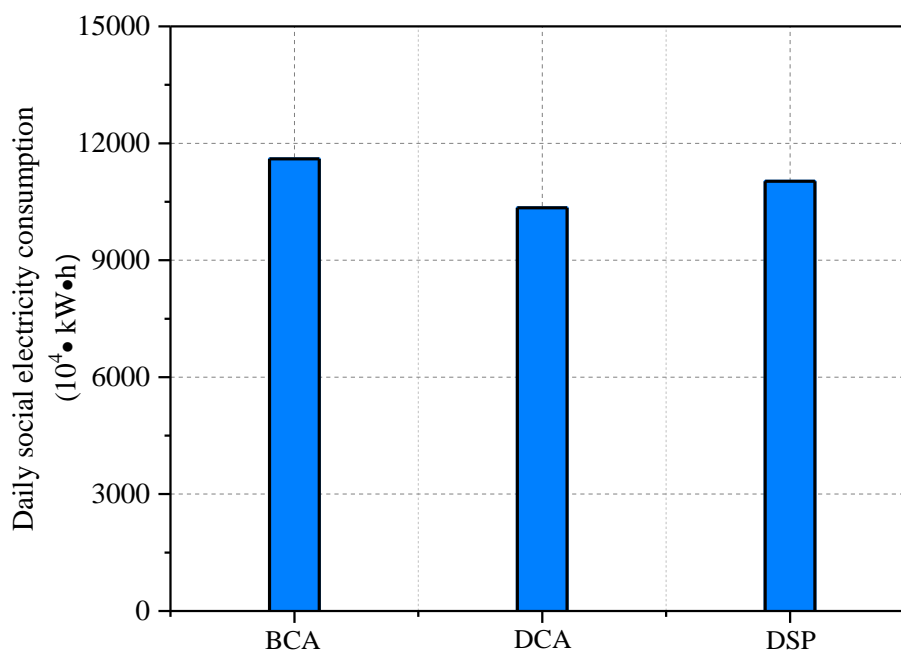

**Fig. S5.** Daily social electricity consumption during the TECA in Shijiazhuang. BCA represents before the control action i.e. from November 1 to 17, 2016; DCA represents during the control action i.e. November 18 to December 31, 2016; DSP represents during the same period of the TECA in 2015 i.e. November 18 to December 31, 2015.

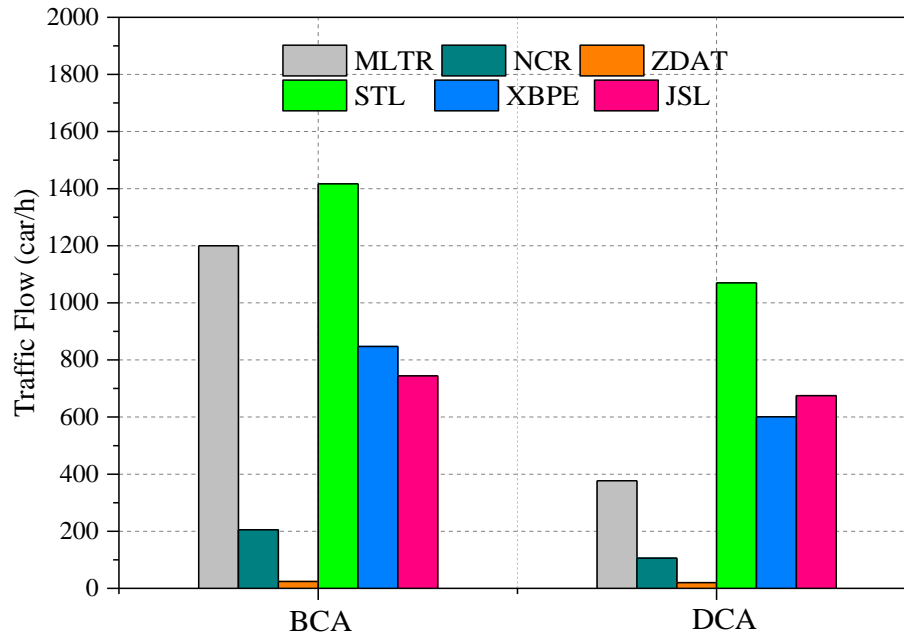

**Fig. S6.** The average traffic flow on arterial roads during different stages of TECA. BCA represents before the control action i.e. from November 1 to 17, 2016; DCA represents during the control action i.e. November 18 to December 31, 2016. The arterial roads include the main line of the third ring road (MLTR), new city road (NCR), the road that from Zhengding high-speed railway station to airport (ZDAT), the Shitai line of Beijing-Kunming expressway (STL), Xibaipo expressway (XBPE) and Jingshi line of the Beijing-Kunming expressway (JSL).



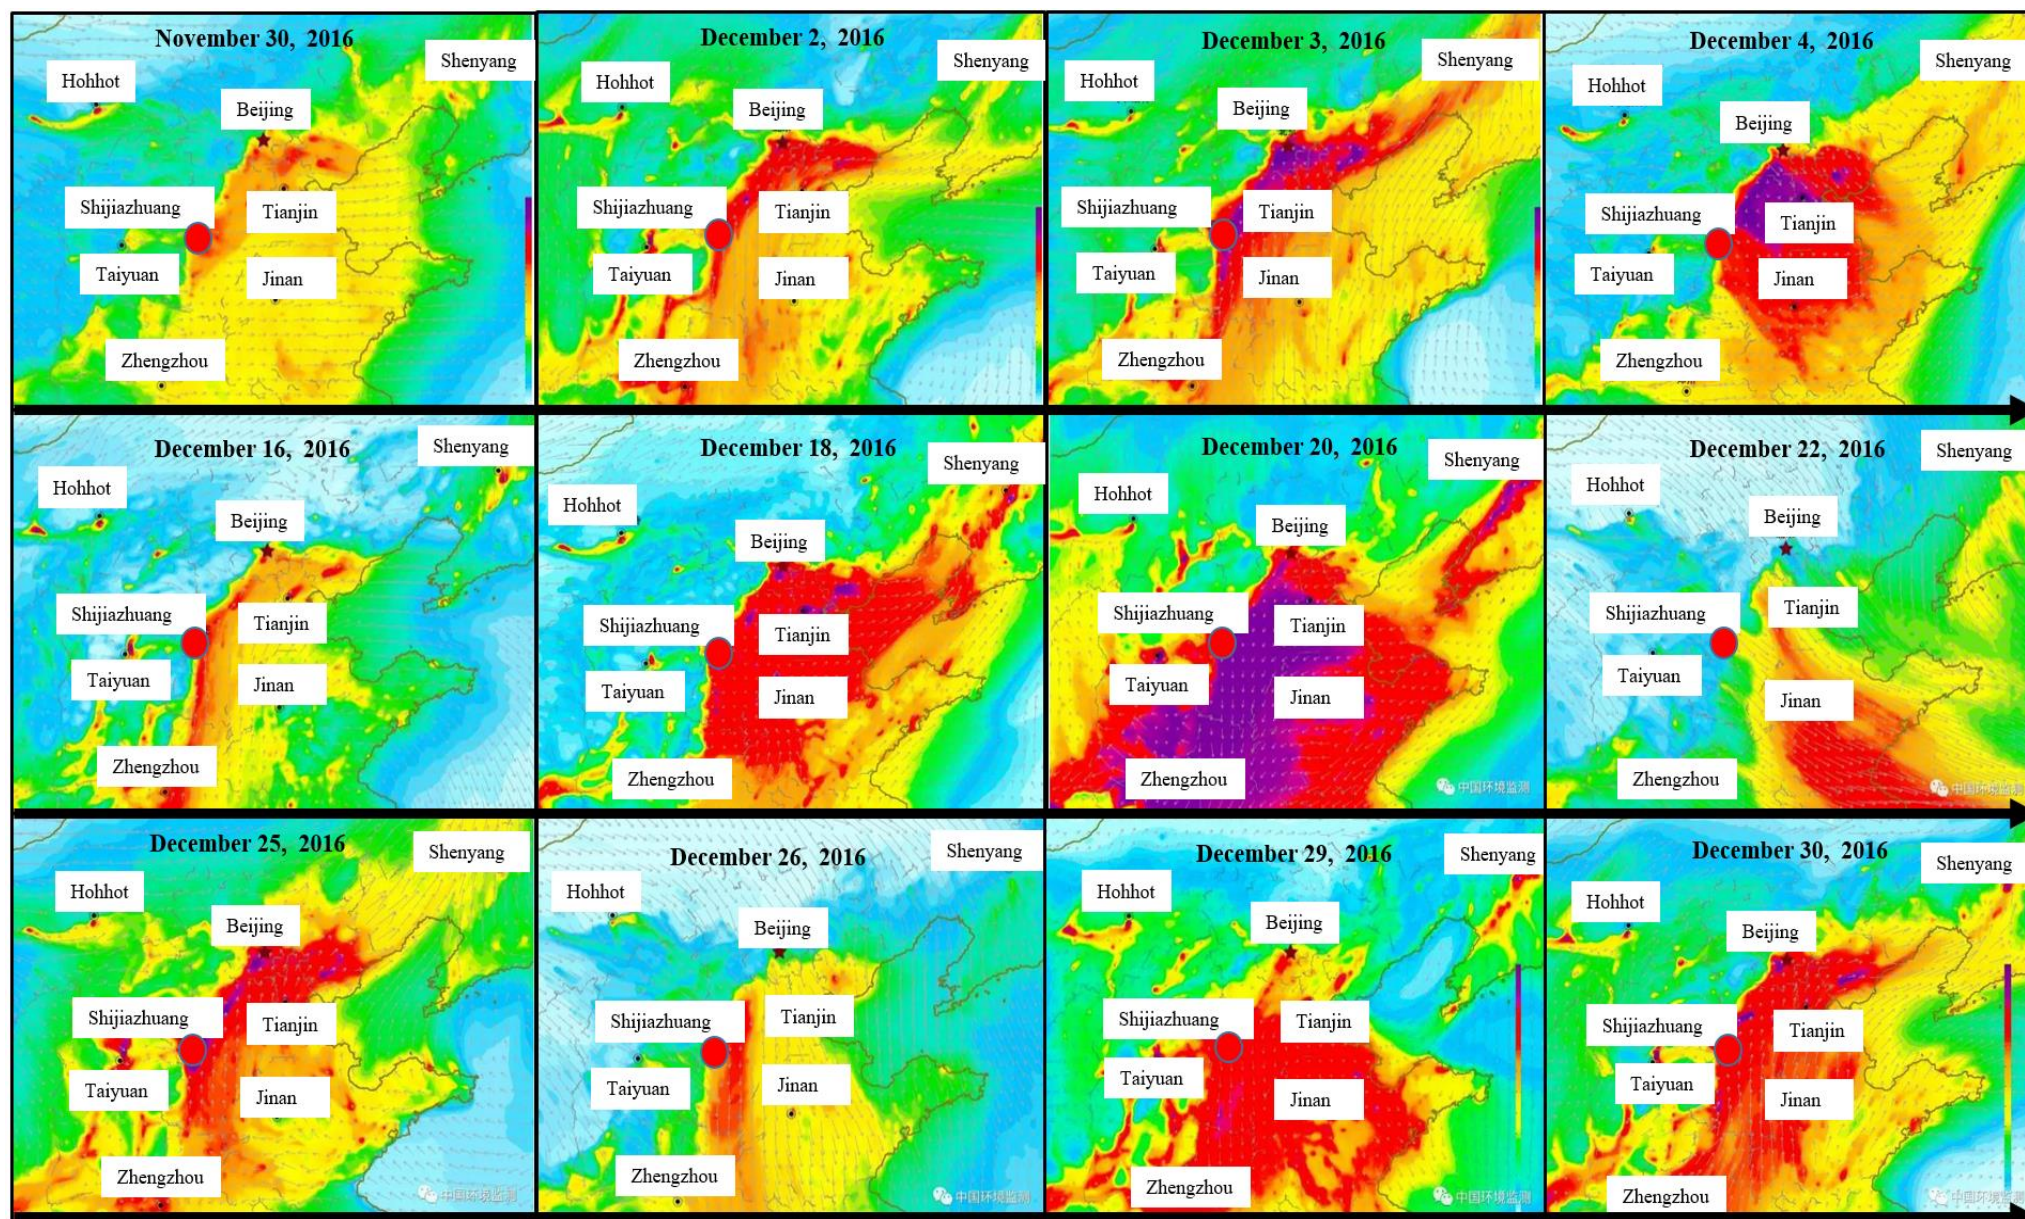

**Fig. S7.** The meteorological flow field maps and the spatial distributions of PM<sub>2.5</sub> in Shijiazhuang during the CAHP. Red and violet represent high PM<sub>2.5</sub> concentration areas. The arrows represent the movement direction of the air masses. Pictures are cited from the website of the China Environmental Monitoring Station (<http://www.cnemc.cn/>).



119

120

121 **Table S1.** Details of the twenty-four monitoring sites in Shijiazhuang during the TECA period.

| Full Names of Monitoring Sites     | Abbreviations | Areas  | Cities/Counties        | Longitude (°) | Latitude (°) |
|------------------------------------|---------------|--------|------------------------|---------------|--------------|
| Twenty-second Middle School        | TSMS          | Urban  | Shijiazhuang City      | 114.56158     | 38.04198     |
| High-tech Zone                     | HTZ           | Urban  | Shijiazhuang City      | 114.6046      | 38.03977     |
| Great Hall of the People           | GHP           | Urban  | Shijiazhuang City      | 114.52144     | 38.05237     |
| Century Park                       | CP            | Urban  | Shijiazhuang City      | 114.54207     | 38.03062     |
| Water Source Area in the Northwest | WSAN          | Urban  | Shijiazhuang City      | 114.50188     | 38.13979     |
| University Area in the Southwest   | UAS           | Urban  | Shijiazhuang City      | 114.46706     | 38.01180     |
| Staff Hospital                     | SH            | Urban  | Shijiazhuang City      | 114.45479     | 38.05132     |
| Fenglong Mountain                  | FLM           | Suburb | Suburb of Shijiazhuang | 114.35409     | 37.90970     |
| Gaoyi                              | GY            | Suburb | Gaoyi Country          | 114.6074      | 37.62268     |
| Gaocheng                           | GC            | Suburb | Suburb of Shijiazhuang | 114.86178     | 38.03854     |
| Xingtang                           | XT            | Suburb | Xingtang Country       | 114.55955     | 38.44420     |
| Jinzhou                            | JZ            | Suburb | Jinzhou City           | 115.07879     | 38.03968     |
| Jingxing Mining District           | JXMD          | Suburb | Jingxing Country       | 114.06893     | 38.07064     |
| Lingshou                           | LS            | Suburb | Lingshou Country       | 114.36702     | 38.31454     |
| Luquan                             | LQ            | Suburb | Suburb of Shijiazhuang | 114.34733     | 38.08473     |
| Luancheng                          | LC            | Suburb | Suburb of Shijiazhuang | 114.63308     | 37.90622     |
| Pingshan                           | PS            | Suburb | Pingshan Country       | 114.20421     | 38.26650     |
| Shenze                             | SZ            | Suburb | Shenze Country         | 115.21301     | 38.19672     |
| Wuji                               | WJ            | Suburb | Wuji Country           | 114.9909      | 38.17842     |
| Xinle                              | XL            | Suburb | Xinle City             | 114.69038     | 38.34926     |
| Yuanshi                            | YS            | Suburb | Yuanshi Country        | 114.51701     | 37.76645     |
| Zanhuang                           | ZH            | Suburb | Zanhuang Country       | 114.39238     | 37.67170     |
| Zhaoxian                           | ZX            | Suburb | Zhaoxian Country       | 114.76986     | 37.77079     |
| Zhengding                          | ZD            | Suburb | Zhengding Country      | 114.59258     | 38.15883     |

122

123

124

125 **Table S2** Detailed information about online sampling.

| Items                                  | Production company             | Model number |
|----------------------------------------|--------------------------------|--------------|
| SO <sub>2</sub>                        | Automated Precision Inc. (API) | T100         |
| NO <sub>2</sub>                        | Automated Precision Inc. (API) | T200         |
| CO                                     | Automated Precision Inc. (API) | T300         |
| O <sub>3</sub>                         | Automated Precision Inc. (API) | T400         |
| PM <sub>2.5</sub> and PM <sub>10</sub> | XianHe, Hebei                  | XHPM2000E    |
| Meteorological conditions              | Davis, America                 | Vantage Pro2 |

126

127

128

129

130

**Table S3** Details of the filter membrane sampling in Shijiazhuang.

| Sampling Sites | Sampling period   | Sample number | Sampling Instrument              | Flow Rate | Sampling Period | Filter Diameter | Filter Pore Size |
|----------------|-------------------|---------------|----------------------------------|-----------|-----------------|-----------------|------------------|
| LC             | 20151124-20170109 | 260           | Thermo Scientific Partisol 2025i | 16.7L/Min | 23h             | 47mm            | 1μm              |
| LQ             | 20151124-20170109 | 260           | Thermo Scientific Partisol 2026i | 16.7L/Min | 23h             | 47mm            | 1μm              |
| TSMS           | 20151124-20170109 | 260           | Thermo Scientific Partisol 2027i | 16.7L/Min | 23h             | 47mm            | 1μm              |

131

LC represents Luquan site, LQ represents Luancheng site, TSMS represents Twenty-second Middle School site.

132

133

134

**Table S4** The detection limits of all the elements by ICP.

| Elements | Detection limits (μg/m <sup>3</sup> ) | Recovery rate (%) |
|----------|---------------------------------------|-------------------|
| Al       | 2.1×10 <sup>-2</sup>                  | 82                |
| Si       | 1.7×10 <sup>-2</sup>                  | 83                |
| Ti       | 1.4×10 <sup>-3</sup>                  | 86                |
| Cr       | 6.8×10 <sup>-4</sup>                  | 100               |
| Mn       | 6.4×10 <sup>-4</sup>                  | 88                |
| Fe       | 2.2×10 <sup>-2</sup>                  | 86                |
| Cu       | 1.4×10 <sup>-2</sup>                  | 94                |
| Zn       | 3.7×10 <sup>-2</sup>                  | 120               |
| As       | 6.5×10 <sup>-5</sup>                  | 87                |
| Pb       | 1.0×10 <sup>-2</sup>                  | 90                |

135

136

**Table S5.** The numbers of closed specific-enterprises in different districts and counties of Shijiazhuang during the TECA period.

| Districts and Counties   | Number | Districts and Counties | Number |
|--------------------------|--------|------------------------|--------|
| High-tech District       | 15     | Pingshan County        | 59     |
| Gaoyi County             | 26     | Qiaoxi District        | 3      |
| Gaocheng district        | 50     | Shenze County          | 4      |
| Xingtang County          | 23     | Wuji County            | 13     |
| Chemical Industry Park   | 5      | Xinhua District        | 14     |
| Jinzhou City             | 115    | Xinle City             | 61     |
| Jingxing Mining District | 11     | Yuhua District         | 1      |
| Jingxing County          | 121    | Yuanshi County         | 12     |
| Lingshou County          | 559    | Zanhuang County        | 16     |
| Luquan District          | 121    | Changan District       | 201    |
| Luancheng District       | 69     | Zhengding County       | 44     |

139

140
