# Supplementary material for: Effectiveness evaluation of temporary emission control action in 2016 winter in Shijiazhuang, China
Source: Copernicus journal article supplement (doi:10.5194/acp-2017-1001), 2017-12-18
Supplement: Supplementary file [file acp-2017-1001-AC1-supplement.zip]

**Effectiveness evaluation of temporary emission control action in 2016  
winter in Shijiazhuang, China**

Baoshuang Liu<sup>a</sup>, Yuan Cheng<sup>a</sup>, Ming Zhou<sup>a</sup>, Danni Liang<sup>a</sup>, Qili Dai<sup>a</sup>, Lu Wang<sup>a</sup>, Wei Jin<sup>b</sup>, Lingzhi Zhang<sup>b</sup>, Yibin Ren<sup>b</sup>, Jingbo Zhou<sup>b</sup>, Chunling Dai<sup>b</sup>, Jiao Xu<sup>a</sup>, Jiao Wang<sup>a</sup>, Yinchang Feng<sup>a\*</sup>, and Yufen Zhang<sup>a\*</sup>

<sup>a</sup> *State Environmental Protection Key Laboratory of Urban Ambient Air Particulate Matter Pollution Prevention and Control, College of Environmental Science and Engineering, Nankai University, Tianjin, 300071, China*

<sup>b</sup> *Environmental Monitoring Station, Shijiazhuang, Hebei, 050023, China*

---

\* Tel./fax: +86 02285358792.

E-mail address: fengyc@nankai.edu.cn (Y. Feng) and zhafox@126.com (Y. Zhang)

## Abstract.

To evaluate the environmental effectiveness of the control measures for atmospheric pollution in Shijiazhuang of China, a large-scale controlling experiment for emission sources of atmospheric pollutants (i.e., a temporary emission control action, TECA) was designed and implemented during November 1, 2016 to January 9, 2017. Under the unfavorably meteorological conditions, compared to the no control action and heating period (NCAHP), the mean concentrations of  $\text{PM}_{2.5}$ ,  $\text{PM}_{10}$ ,  $\text{SO}_2$ ,  $\text{NO}_2$ , and chemical species ( $\text{Si}$ ,  $\text{Al}$ ,  $\text{Ca}^{2+}$ ,  $\text{Mg}^{2+}$ ) in  $\text{PM}_{2.5}$  during the control action and heating period (CAHP) still decreased by 15 %, 26 %, 5 %, 19 %, 30.3 %, 4.5 %, 47.0 % and 45.2 %, respectively, indicating that the control measures for atmospheric pollution were effective and was in a right direction. The effects of control measures in suburbs were better than those in urban area, especially for the control effects of particulate matter sources. The control effects for emission sources of carbon monoxide (CO) were not apparent during the TECA period, especially in suburbs, likely due to the increasing usage of domestic coal in suburbs along with the temperature decreasing.

The results of PMF analysis showed that crustal dust, secondary sources, vehicle emissions, coal combustion and industrial emissions were main  $\text{PM}_{2.5}$  sources. Compared to the whole year (WY) and the no control action and no heating period (NCANHP), the contribution concentrations and proportions of coal combustion to  $\text{PM}_{2.5}$  increased significantly during other stages of TECA period. The contribution concentrations and proportions of crustal dust and vehicle emissions to  $\text{PM}_{2.5}$  decreased apparently during the CAHP compared to other stages of TECA period. The contribution concentrations and proportions of industrial emissions to  $\text{PM}_{2.5}$  during the CAHP decreased apparently compared to the NCAHP. The pollutants' emission sources during the CAHP were in effective control, especially for crustal dust and vehicles. While the necessary coal heating for cold winter and the unfavorably meteorological conditions had an offset effect on the control measures for emission sources to some degree. The results also illustrated that the discharge of pollutants might be still enormous even under such strict control measures.

The backward trajectory and potential source contribution function (PSCF) analysis in the light of atmospheric pollutants suggested that the potential sources-areas mainly involved in the surrounding regions of Shijiazhuang, i.e., south of Hebei, north of Henan and Shanxi. The regional nature of the atmospheric pollution in Northern China Plain revealed that there is an urgent need for making cross-boundary control policy except for local control-measures given the high background

52 level of pollutants.

53 The TECA is an important practical exercise but it can't be advocated as the normalized control  
54 measures for atmospheric pollution in China. The direct cause of atmospheric pollution in China is  
55 the emission of pollutants exceeds the air environment's self-purification capacity, and the essential  
56 reason is unreasonable and unhealthy pattern for economic development of China.

57

58 **Keywords:** Atmospheric pollutants; Effectiveness evaluation; Control action; PMF; PSCF

59

## 1 Introduction

As a consequence of rapid industrialization and urbanization, China has been suffering from air quality degradation in recent years (Fu et al., 2014; Gao et al., 2015; Han et al., 2014; Hao et al., 2017; Zhao et al., 2011). Frequently occurred severe haze is featured by long duration, extensive coverage and sharply-increasing particulate concentration (Jiang and Xia, 2017; Tao et al., 2014; Wang et al., 2016a; Zhang et al., 2015a). It has been suggested that severe haze pollution increases the risk of respiratory and cardiovascular diseases (Chen et al., 2013; Gao et al., 2015; Pan et al., 2014; Zhang et al., 2014a; Zhou et al., 2015). On the basis of previous statistics, there are four haze-prone city clusters in China, including Beijing-Tianjin-Hebei region, Yangtze River Delta, Pearl River Delta and Sichuan Basin (Bi et al., 2014; Chen et al., 2016a; Fu et al., 2014; Fu and Chen, 2017; Li et al., 2016b; Tao et al., 2013a; Wang et al., 2015b; Wu et al., 2008; Zhang et al., 2015b). In recent years, the role of particulates in hazy events has been becoming more and more prominent. The particulates can be discharged from varieties of sources or formed by physicochemical/aqueous-oxidation reactions between gaseous precursors, which have significant negative effects on climate, atmospheric visibility and public health (Chen et al., 2015; Fu and Chen, 2017; Lee et al., 2015; Quinn and Bates, 2003; Shen et al., 2015; Tai et al., 2010; Zhang et al., 2010). The high observed concentrations of fine particles and prolonged haze events have occurred frequently during autumn and winter, and covered large regions in China. In some cases, the instantaneous mass concentration of PM<sub>2.5</sub> had reached up to 1000 µg/m<sup>3</sup> (Qin et al., 2016; Zhang et al., 2014b), which caused the extensive concern from citizens and government agencies.

Confronted with severe air pollution and degradation of air quality, the government has taken a variety of control measures in recent years, including the odd-and-even license plate rule (<http://www.sjz.gov.cn/col/1274081553614/2016/11/17/1479391129628.html>), the mandatory installation of desulfurization, denitration and other pollution-controlling facilities in factories (Liu et al., 2017a; Ma et al., 2015; Peng et al., 2017) and the on-line monitoring system structure plan in construction sites, etc. The atmospheric quality in China has been notably improved so far. From 2013 to 2016, the concentrations of atmospheric pollutants in China showed a decreased trend, and the annual mean concentrations of PM<sub>2.5</sub>, PM<sub>10</sub>, SO<sub>2</sub> and NO<sub>2</sub>, in 2016 reached up to 50 µg/m<sup>3</sup>, 85 µg/m<sup>3</sup>, 21 µg/m<sup>3</sup> and 39 µg/m<sup>3</sup>, respectively, and significantly lower than those in 2013 (<http://www.zhb.gov.cn/hjzl/zghjzkqb/lnzghjzkqb/>). However, the annual mean concentrations of

PM<sub>2.5</sub> and PM<sub>10</sub> in 2016 were still 1.4 and 1.2 times higher than the national ambient air quality standard (NAAQS) (GB3095-2012 Grade II, PM<sub>2.5</sub>: 35 µg/m<sup>3</sup>, PM<sub>10</sub>:70 µg/m<sup>3</sup>). Note that the concentrations of PM<sub>2.5</sub> and PM<sub>10</sub> during Beijing-Tianjin-Hebei region were up to 71 µg/m<sup>3</sup> and 119 µg/m<sup>3</sup> in 2016, and 2.0 and 1.7 times higher than the NAAQS, respectively. Therefore, China still has a lot of work to do to improve the national air quality.

Over the last decade, Chinese government has implemented stricter control-measures for emission sources during multiple international events held in China than normal times (Chen et al., 2016b; Guo et al., 2013; Liu et al., 2013; Sun et al., 2016; Wang et al., 2010; Wang et al., 2017). For instance, the first attempt took place during the Beijing 2008 Olympic Games (Guo et al., 2013). Drastic control actions were executed to cut down the emissions of atmospheric pollutants from motor vehicles, industries and building construction activity (UNEP, 2009; Wang et al., 2009a; Wang et al., 2010). UNEP (2009) suggested that the concentration of PM<sub>10</sub> in Beijing was reduced by 20 % due to the emission reduction measures. Liu et al. (2013) reported that the concentrations of SO<sub>2</sub>, NO<sub>2</sub>, PM<sub>10</sub> and PM<sub>2.5</sub> were reduced by 66.8 %, 51.3 %, 21.5 % and 17.1 %, respectively, during the 2010 Asian Games in Guangzhou of China, and during which stricter control measures for emission sources were implemented. Furthermore, further stricter controls for emission sources were implemented in both Beijing and its surrounding regions during the 2014 Asia-Pacific Economic Cooperation (APEC) summit and Parade. Compared to no-control during APEC and Parade, a decreasing trend with 51.6~65.1 % and 34.2~64.7 % of PM<sub>2.5</sub> concentrations during the control period was reported (Wang et al., 2017). Eventually, all the efforts led to a blue-sky days during the APEC, which was acknowledged as “APEC Blue” (Wang et al., 2016b). As we can see that the air quality can be improved in response to stricter emission controls in international events held in China. However, once these stricter control-measures of emission sources were repealed, and the air quality would be deteriorated subsequently ([http://www.mep.gov.cn/gkml/hbb/qt/201412/t20141218\\_293152.htm](http://www.mep.gov.cn/gkml/hbb/qt/201412/t20141218_293152.htm)), indicating that the prevention and control of air pollution in China still had a long way to go.

Shijiazhuang (38.03° N, 114.26° E), a hinterland city of Northern China Plain with a high population density, is an important city in Beijing-Tianjin-Hebei region (Sun et al., 2013). The rapid industry development has a great contribution to this city’s economic growth and degradation of air quality at the same time (Du et al., 2010; Li et al., 2015; Yang et al., 2015, 2016a). Shijiazhuang has

been one of the cities with the most serious air pollution in the world (<https://www.statista.com/chart/4887/the-20-worst-cities-worldwide-for-air-pollution/>), and deteriorating air quality poses a great risk to public health (<http://www.who.int/ceh/risks/cehair/en/>), as well as drags on the expansion of economy. The government of Shijiazhuang has adopted a variety of control measures (<http://www.sjzhb.gov.cn/>), however, it seems that the improvement in air quality of Shijiazhuang is not go into effect so far, and the atmospheric pollution is still heavy. In 2016, the annual concentrations of PM<sub>2.5</sub> and PM<sub>10</sub> in Shijiazhuang reached up to 70 µg/m<sup>3</sup> and 123 µg/m<sup>3</sup>, respectively, which were 2.0 and 1.8 times higher than the NAAQS (GB3095-2012 Grade II) ([http://www.zhb.gov.cn/hjzl/tj/201706/t20170606\\_415527.shtml](http://www.zhb.gov.cn/hjzl/tj/201706/t20170606_415527.shtml)). Especially in the heating period in winter, the degree of atmospheric pollution in Shijiazhuang was even more serious. The effectiveness of control measures has been queried in recent years. Therefore, based on previous examples of APEC, Parade and the Asian Games, etc., a large-scale controlling experiment for atmospheric pollutants sources (i.e., TECA) was designed and implemented to investigate whether control measures in Shijiazhuang are effective for the atmospheric pollution. The experiment was carried out in Shijiazhuang during November 1 2016 to January 9 2017, during which more stringent control measures of atmospheric pollution than usual were put into practice. Then, by combining of the changes of atmospheric pollutants concentrations, emission source contributions and other factors such as meteorological conditions, regional transmission, etc., the effectiveness of control measures was evaluated before and after the control measures were taken.

## **2 Materials and Methods**

### **2.1 Site description**

Shijiazhuang city is located in the east of Taihang Mountain in north of China (Fig. 1), and the urban area is 15848 km<sup>2</sup>, with a population of more than 10 million in 2016. Shijiazhuang is a large industrial city that is famous for raw materials, energy production and steel, power, and cement industries. The number of vehicles is more than 2.0 million until 2016. Shijiazhuang has a typical temperate and monsoonal climate with four clearly distinct seasons, with northeasterly, southeasterly and northwesterly winds prevailed during the TECA period (Fig. S1). The mean wind speed was 0.6 m/s, and the average temperature was 14.9 °C during the TECA period. The mean relative humidity was up to 76.5 %, and the mean height of mixed layer was 509 m during the TECA period. The meteorological conditions during the four stages of the TECA period in Shijiazhuang

were shown in Table 1.

The seven monitoring sites including Twenty-second Middle School (TSMS), High-tech Zone (HTZ), Great Hall of the People (GHP), Century Park (CP), Water Source Area in the Northwest (WSAN), University Area in the Southwest (UAS) and Staff Hospital (SH) are located in urban area of Shijiazhuang. While other seventeen sites including Fenglong Mountain (FLM), Gaoyi (GY), Gaocheng (GC), Xingtang (XT), Jinzhou (JZ), Jingxing Mining District (JXMD), Lingshou (LS), Luquan (LQ), Luancheng (LC), Pingshan (PS), Shenze (SZ), Wuji (WJ), Xinle (XL), Yuanshi (YS), Zhanhuang (ZH), Zhaoxian (ZX) and Zhengding (ZD) are suited in suburbs of Shijiazhuang. The more details were shown in Table S1.

----

**Fig. 1.** Maps of the online monitoring stations and the filter membrane sampling sites in Shijiazhuang. The 24 online monitoring stations mainly include Twenty-second Middle School (TSMS), Fenglong Mountain (FLM), High-tech Zone (HTZ), Great Hall of the People (GHP), Century Park (CP), Water Source Area in the Northwest (WSAN), University Area in the Southwest (UAS), Staff Hospital (SH), Gaoyi (GY), Gaocheng (GC), Xingtang (XT), Jinzhou (JZ), Jingxing Mining District (JXMD), Lingshou (LS), Luquan (LQ), Luancheng (LC), Pingshan (PS), Shenze (SZ), Wuji (WJ), Xinle (XL), Yuanshi (YS), Zhanhuang (ZH), Zhaoxian (ZX) and Zhengding (ZD). The filter membrane sampling sites are mainly located in TSMS, LQ and LC.

**Table 1.** The meteorological conditions during the four stages (NCANHP, NCAHP, CAHP and ACA) of the TECA period in Shijiazhuang.

----

## 2.2 Sampling and Analysis

### 2.2.1 Sampling

From November 1, 2016 to January 9, 2017, the concentrations of PM<sub>2.5</sub>, PM<sub>10</sub>, SO<sub>2</sub>, NO<sub>2</sub>, CO, O<sub>3</sub> and synchronous meteorological conditions (temperature, relative humidity, wind speed and wind direction) were monitored in the 24 monitoring sites belonged to national, provincial and city controlling points (Fig. 1). The more details about monitoring instruments were described in Table S2. The heights of mixed layer were measured with a lidar scanner (AGHJ-I-LIDAR (HPL)), which was set at an atmospheric gradient monitoring station in Shijiazhuang near CP site (Fig. 1), and more details were shown in supplemental material. The PM<sub>2.5</sub> filter membrane samples were collected in TSMS, LQ, and LC sites from November 24, 2015 to January 9, 2017. Three sampling sites were set on the rooftops of buildings at 12-15 meters above ground level. Meanwhile, the parallel samples and the field blanks were also collected at each site. More details about filter membrane sampling were shown in Table S3. Before sampling, the quartz filter membranes (47 mm

in diameter, Whatman, England) and polypropylene filter membranes (47 mm in diameter, Beijing Synthetic Fiber Research Institute, China) were baked in the oven at 500 °C and 60 °C, respectively. All the filter membranes after sampling were stored at 4 °C before subsequent gravimetric and chemical analysis to improve the accuracy of experimental results.

## **2.2.2 Gravimetric and Chemical analysis**

A 24-hour equilibrium process of PM<sub>2.5</sub> filter membranes was performed at a condition of constant temperature ( $20 \pm 1$  °C) and humidity (45-55 %) before gravimetric analysis. For the gravimetric analysis, all the filter membranes were weighted twice on a microbalance with resolution of 0.01 mg (Mettler Toledo, XS105DU) before and after sampling. An electrostatic eliminating device was applied to ensure the accuracy of gravimetric results.

After the gravimetric analysis, the quartz filter membranes which carried atmospheric particulates were used to analyze water-soluble ions by Ion chromatography (Thermo Fisher Scientific, Dionex, ICS-5000+). One-eighth of the filter membrane was cut up and put into a 25 mL glass tube with 20 mL ultrapure water. After 1-hour ultrasonic extraction and 3 minutes centrifugalization, the supernatant was filtered with disposable filter head (0.22 µm) for subsequent instrumental analysis. The ions analyzed included  $\text{SO}_4^{2-}$ ,  $\text{NO}_3^-$ ,  $\text{Cl}^-$ ,  $\text{NH}_4^+$ ,  $\text{K}^+$ ,  $\text{Ca}^{2+}$ ,  $\text{Na}^+$  and  $\text{Mg}^{2+}$ , and more details were shown in Figs. S2 and S3. Prior to the ions detection, standard solutions were prepared and detected for over three times and low relative standard deviations (RSD) were obtained. Analytical quantification was carried out by using calibration curves made from standard solutions prepared.

Polypropylene filter membranes were used for elemental analysis by inductively coupled plasma–mass spectrometry (ICP-MS, Agilent 7700x). Perchloric acid-nitric acid digestion method was applied for the pretreatment of filter membranes. Aggregately, 10 elemental species (Al, Si, Ti, Cr, Mn, Fe, Cu, Zn, As and Pb) were determined. The detection limits of all the elements were shown in Table S4. For quality assurance and quality control (QA/QC), standard reference materials were pre-treated and analyzed with the same procedure, with the recovered values for all the target elements falling into the range or within 5 % of certified values.

The OC and EC were determined on a 0.558 cm<sup>2</sup> quartz filter membrane punch by Desert Research Institute (DRI) Model 2001 Thermal/Optical Carbon Analyzer with IMPROVE A thermal/optical reflectance (TOR) protocol. The quartz filter membrane was heated stepwise to



temperatures of 140 °C, 280 °C, 480 °C and 580 °C in a non-oxidizing helium (He) oven to analyse OC1, OC2, OC3 and OC4, respectively. Then, the oven was added to an oxidizing atmosphere of 2 % oxygen (O<sub>2</sub>) and 98 % He, and the quartz filter membrane was gradually heated to 580 °C, 780 °C and 840 °C to analyse EC1, EC2 and EC3, respectively. The POC is defined as the carbon combusted after the initial introduction of oxygen and before the laser reflectance signal achieves its original value and the POC is specified as the fraction of OC. According to the IMPROVE A protocol, OC is defined as OC1+OC2+OC3+OC4+POC, and EC is defined as EC1+EC2+EC3-POC. For QA/QC, we carried out the measurement with the field blank filter membranes, standard sucrose solution and repeated analysis in the study. During each season, the field blanks were sampled and the particulate samples have been corrected by the average concentration of the blanks. For checking the precision of instrument, a replicate sample was analysed for every 10 samples, and the standard deviation  $< \pm 5\%$  was accepted. The method detection limits (MDLs) of OC and EC are 0.45 and 0.06 µg/cm<sup>2</sup>, respectively.

### 2.3 PMF model

PMF model can decompose a matrix of sample data (X) into two matrices: source profile (F) and source contribution (G), in terms of observations at the sampling sites (Paatero and Tapper, 1994). The principle of PMF model can be described by:

$$X_{ij} = \sum_{k=1}^p g_{ik} f_{kj} + e_{ij} \quad (1)$$

where  $X_{ij}$  represents concentration of the  $j^{th}$  species in the  $i^{th}$  sample,  $g_{ik}$  represents the contribution of the  $k^{th}$  source to the  $i^{th}$  sample,  $f_{kj}$  represents the source profile of  $j^{th}$  species from the  $k^{th}$  source,  $e_{ij}$  represents the residual for the  $j^{th}$  species in the  $i^{th}$  sample, and  $p$  represents the number of sources.

PMF can identify emission sources of PM<sub>2.5</sub> without source profiles. Data below MDLs are retained for using in PMF model with the related uncertainty adjusted in terms of the characteristics that PMF model admits data to be signally weighed. To assess the stability of the solution, the object function Q can be allowed to review the distribution of each species, which is expressed by:

$$Q = \sum_{i=1}^n \sum_{j=1}^m \left[ \frac{x_{ij} - \sum_{k=1}^p g_{ik} f_{kj}}{\mu_{ij}} \right]^2 \quad (2)$$

where  $\mu_{ij}$  represents the uncertainty of  $j^{th}$  species in the  $i^{th}$  sample, which is applied to weight the observations that include the sampling errors, missing data, detection limits and outliers.

The purpose of PMF model was to minimize the function (Eq. (2)). Data below MDLs were

retained and their uncertainties were set to 5/6 of the MDLs. Missing values were replaced by the median concentration of a given species, with an uncertainty of four times the median (Brown et al., 2015). Values that were larger than the MDLs, the calculation of uncertainty was in terms of a user supplied fraction of the concentration and MDLs, and the error fraction was suggested as 10 % by Paatero (2000). Uncertainty was described by:

$$\text{Uncertainty} = \sqrt{(\text{Error Fraction} \times \text{concentration})^2 + (0.5 \times \text{MDL})^2} \quad (3)$$

In this study, EPA PMF 5.0 model was used to identify the PM<sub>2.5</sub> sources in Shijiazhuang city. Based on the field investigation and change of  $Q$  values, and finally, five factors were chosen in PMF analysis. When five factors were chosen and input in PMF model, and the calculated  $Q$  value (5162) from PMF model was close to theoretical values (5045). The observed PM<sub>2.5</sub> concentrations and calculated PM<sub>2.5</sub> concentrations from PMF model showed high correlations ( $r = 0.96$ ) (Fig. S4). S/N is the signal-to-noise ratio, which is used to address weak and bad variables when running PMF model (Paatero and Hopke, 2003). The signal vector is identified as S and the noise vector is identified as N. Next, S/N is defined as Eq. (4). Variables with  $S/N \leq 0.2$  were removed from the analysis, while weak variables ( $0.2 \leq S/N \leq 2.0$ ) were down-weighted (Ancelet et al., 2012). S/N of As, Ti and Cr were lower than 1.0 in this study, and these species were set as weak variables.

$$S/N = \sqrt{\sum s_i^2 / \sum n_i^2} \quad (4)$$

where  $i$  represents the chemical species in PM<sub>2.5</sub>.

## 2.4 Backward trajectory and PSCF model

In this study, the 72-h backward trajectory arriving in Shijiazhuang (38.05° N, 55.2° E) was calculated at 1-h intervals during the CAHP by the Hybrid Single Particle Lagrangian Integrated Trajectory (HYSPLIT) model. The final global analysis data were produced from the National Center for Environmental Prediction's Global Data Assimilation System wind field reanalysis (<http://www.arl.noaa.gov/>). The model was run 4 times per day at starting times, i.e., 0:00, 06:00, 12:00, 18:00 LT; the starting height was set at 100 m above the ground. The PSCF model was used to identify the potential sources-areas in terms of the HYSPLIT analysis. The study region was divided into  $i \times j$  small equal grid cells. The trajectory clustering and PSCF model were performed by using the GIS-based software TrajStat (Liu et al., 2017a; Wang et al., 2009b). The PSCF value was defined as:

$$PSCF = \frac{m_{ij}}{n_{ij}} \quad (5)$$

where  $i$  and  $j$  were the latitude and longitude indices,  $n_{ij}$  represented the number of endpoints that fell in the  $ij$  cell, and  $m_{ij}$  was the number of endpoints in the same cell that were related to the samples that were greater than the threshold criterion.

Based on the NAAQS (GB3095-2012 guideline value (24 h) of Grade II), the criterion values of PM<sub>2.5</sub>, PM<sub>10</sub>, NO<sub>2</sub>, CO were set to 75 µg/m<sup>3</sup>, 150 µg/m<sup>3</sup>, 80 µg/m<sup>3</sup> and 4 mg/m<sup>3</sup>, respectively. The criterion values of SO<sub>2</sub> and O<sub>3</sub> were set to 68 µg/m<sup>3</sup> and 15µg/m<sup>3</sup> respectively, in terms of the average during the CAHP. When  $n_{ij}$  is smaller than three times the grid average number of trajectory endpoint ( $n_{ave}$ ), a weighting function  $W(n_{ij})$  was used to reduce uncertainty in cells (Dimitriou et al., 2015). The weighting function was defined by:

$$WPSCF_{ij} = \frac{m_{ij}}{n_{ij}} * W(n_{ij}) \quad (6)$$

$$W(n_{ij}) = \begin{cases} 1.00, 3n_{ave} < n_{ij} \\ 0.70, 1.5n_{ave} < n_{ij} \leq 3n_{ave} \\ 0.40, n_{ave} < n_{ij} \leq 1.5n_{ave} \\ 0.20, n_{ij} \leq n_{ave} \end{cases} \quad (7)$$

The studying field ranged from 33° N to 51° N, and 97° E to 121° E, and the region that was covered by the backward trajectories was divided into 432 grid cells of 1.0° × 1.0°. The total number of endpoints during the CAHP was 12672. Accordingly, there was an average of 5 trajectory endpoints in per cell ( $n_{ave} = 5$ ).

## 2.5 Measures taken in the controlling experiment

The measures taken in the controlling experiment began on November 18, 2016 and ended on December 31, 2016 in Shijiazhuang (<http://www.sjz.gov.cn/col/1274081553614/2016/11/17/1479391129628.html>). The measures taken in the control action were mainly aimed at controlling emission sources of atmospheric pollutants in Shijiazhuang, which mainly included five aspects: (1) reduce the usage of coal, (2) decrease industrial production, (3) inhibition of dust emission, (4) driving restriction, and (5) prohibit open burning. The more details were described in supplemental material.

Actually, a total of 1543 enterprises were shut down in the whole city of Shijiazhuang during the control action period, including pharmaceutical, steel, cement, coking, casting, glass, ceramics, calcium and magnesium, sheet, sand and stone processing, stone processing and other industries.

The situation of specific closed-enterprises in different districts and counties is shown in Table S5. In closed enterprises in Shijiazhuang, the number of mining and stone processing enterprises was the largest, which was up to 733 and account for 48 % of all the closed enterprises. The numbers of casting and building materials enterprises were up to 297 and 227, respectively, accounting for 19 % and 15 % of the all, respectively. In addition, 64 enterprises related to pharmaceutical industry were halted only for the VOC technology, and the 17 enterprises related to chemical industry must stop production. The numbers of closed enterprises for cement and calcium/magnesium industry were up to 49 and 40, respectively. The number of closed factories related to furniture and tanneries was 43, and the numbers of closed steel and coking enterprises were up to 4 and 7, respectively.

The average value of daily social-electricity consumption from November 18 to December 31, 2016 was 103,470,000 kW • h (Fig. S5), which declined 10 % compared to that of daily social-electricity consumption from November 1 to 17, 2016, and declined 6 % compared to that of daily social-electricity consumption during the same period in 2015. Restriction of motor vehicles based on odd-and-even license plate rule in urban area of Shijiazhuang resulted in the decrease of the average traffic-flow on arterial roads, which reduced about 30 % compared to before the control action (Fig. S6). The dust emission can be reduced about 390 tons per day by a series of dust control-measures. Compared to before the control action, the daily emissions of SO<sub>2</sub>, NO<sub>x</sub>, smoke dust and VOCs reduced about 20 %, 33 %, 15 % and 7 %, respectively, during the control action period, on the basis of the statistics on pollutants emission inventories.

### **3 Results and discussion**

#### **3.1 Variations of atmospheric pollutants concentrations**

##### **3.1.1 Temporal trend**

The time series of atmospheric pollutants concentrations during the TECA period are shown in Fig. 2. The average concentrations of PM<sub>2.5</sub> and PM<sub>10</sub> during the TECA period in Shijiazhuang were up to 181 µg/m<sup>3</sup> and 295 µg/m<sup>3</sup>, respectively, which were 5.2 and 3.2 times than the Grade II limit values in the NAAQS. The ratio of PM<sub>2.5</sub>/PM<sub>10</sub> reached up to 0.62 during the TECA period, indicating that the fine particulate dominated on the particulate pollution in Shijiazhuang. The mean concentration of PM<sub>2.5</sub> during the TECA period was significantly higher than those of winter in Beijing (95.50 µg/m<sup>3</sup>), Tianjin (144.6 µg/m<sup>3</sup>), Hangzhou (127.9-144.9 µg/m<sup>3</sup>), Heze (123.6 µg/m<sup>3</sup>) and Xinxiang (111 µg/m<sup>3</sup>) (Cheng et al., 2015; Gu et al., 2011; Liu et al., 2015; Liu et al., 2017a;

Feng et al., 2016), and lower than those of winter in Handan (240.6  $\mu\text{g}/\text{m}^3$ ) and Xian (266.8  $\mu\text{g}/\text{m}^3$ ) (Meng et al., 2016; Zhang et al., 2011). Additionally, the NAAQS (GB3095-2012 Grade II) values of  $\text{SO}_2$ ,  $\text{NO}_2$ , CO and  $\text{O}_3$  were 60  $\mu\text{g}/\text{m}^3$ , 40  $\mu\text{g}/\text{m}^3$ , 4  $\text{mg}/\text{m}^3$  and 160  $\mu\text{g}/\text{m}^3$ , respectively. During the TECA period, the average concentration of  $\text{SO}_2$  (60  $\mu\text{g}/\text{m}^3$ ) could meet the NAAQS, and that of  $\text{NO}_2$  (81  $\mu\text{g}/\text{m}^3$ ) was far exceed the NAAQS; while those of CO (3.4  $\text{mg}/\text{m}^3$ ) and  $\text{O}_3$  (15  $\mu\text{g}/\text{m}^3$ ) were less than the NAAQS.

As well known, the date of coal-fired heating in Shijiazhuang began in November 15, 2016 (<http://www.sjz.gov.cn/col/1451896947837/2016/10/28/1477635691926.html>). Depending on the changes of atmospheric pollution sources and meteorological conditions (Table 1), the timeline of the TECA was divided into four stages: stage 1: no control action and no heating period (NCANHP), ranging from November 1 to 14, 2016; stage 2: no control action and heating period (NCAHP), ranging from November 15 to 17, 2016; stage 3: control action and heating period (CAHP), ranging from November 18 to December 31, 2016; stage 4: after control action (ACA), ranging from January 1 to 9, 2017.

During the TECA period, the variations of atmospheric pollutants concentrations were mainly affected by the heating for cold winter and the control measures of the control action except for the meteorological conditions. Therefore, we defined the following equations to evaluate the effects of the heating and control action, respectively, based on the atmospheric pollutants concentrations during the different stages of TECA (i.e., NCANHP, NCAHP, CAHP and ACA).

$$P_{i\text{-heating}} = \frac{(C_{i\text{-NCAHP}} - C_{i\text{-NCANHP}}) \times 100}{C_{i\text{-NCANHP}}} \quad (8)$$

$$P_{i\text{-action}} = \frac{(C_{i\text{-NCAHP}} - C_{i\text{-CAHP}}) \times 100}{C_{i\text{-NCAHP}}} \quad (9)$$

where  $P_{i\text{-heating}}$  represents the increasing percentage (%) of atmospheric pollutant concentration because of the combined effects of heating for cold winter and meteorological conditions;  $P_{i\text{-action}}$  represents the decreasing percentage (%) of atmospheric pollutant concentration because of the combined influences of control action and meteorological conditions;  $C_{i\text{-NCANHP}}$  represents the concentration ( $\mu\text{g}/\text{m}^3$ , CO:  $\text{mg}/\text{m}^3$ ) of atmospheric pollutant during the no-control action and no-heating period;  $C_{i\text{-NCAHP}}$  represents the concentration ( $\mu\text{g}/\text{m}^3$ , CO:  $\text{mg}/\text{m}^3$ ) of atmospheric pollutant during the no-control action and heating period;  $C_{i\text{-CAHP}}$  represents the concentration ( $\mu\text{g}/\text{m}^3$ , CO:  $\text{mg}/\text{m}^3$ ) of atmospheric pollutant during the control action and heating period.

During the NCANHP, the mean concentrations of  $\text{PM}_{2.5}$  and  $\text{PM}_{10}$  were  $156 \mu\text{g}/\text{m}^3$  and  $253 \mu\text{g}/\text{m}^3$  in Shijiazhuang, respectively. With the beginning of heating, the mean concentrations of  $\text{PM}_{2.5}$  and  $\text{PM}_{10}$  increased  $44 \mu\text{g}/\text{m}^3$  and  $64 \mu\text{g}/\text{m}^3$  during the NCAHP, respectively, and the  $P_{\text{PM}_{2.5}\text{-heating}}$  and  $P_{\text{PM}_{10}\text{-heating}}$  values were up to 28 % and 25 % (Fig. 3 and Fig. 4). However, during the CAHP, the mean concentrations of  $\text{PM}_{2.5}$  and  $\text{PM}_{10}$  were  $185 \mu\text{g}/\text{m}^3$  and  $291 \mu\text{g}/\text{m}^3$ , respectively, which decreased by 15 % and 26 % compared to the NCAHP. And the  $P_{\text{PM}_{2.5}\text{-action}}$  and  $P_{\text{PM}_{10}\text{-action}}$  values were 8 % and 8 %, respectively. The mean height of mixed layer, the mean wind speed and temperature during the CAHP were lower than those during the NCAHP (Table 1). Unfavorably meteorological conditions during the CAHP had an offset effect on the control measures for emission sources. In view of Eq. (9), it can be seen that the positive values for  $P_{\text{PM}_{2.5}\text{-action}}$  and  $P_{\text{PM}_{10}\text{-action}}$  are more able to show that control action was effective. During the ACA, the concentrations of  $\text{PM}_{2.5}$  and  $\text{PM}_{10}$  were  $227 \mu\text{g}/\text{m}^3$  and  $383 \mu\text{g}/\text{m}^3$ , respectively, which increased significantly by  $42 \mu\text{g}/\text{m}^3$  and  $92 \mu\text{g}/\text{m}^3$  compared to the CAHP. The variations of  $\text{SO}_2$  and  $\text{NO}_2$  concentrations during different stages of TECA were similar to those of  $\text{PM}_{2.5}$  and  $\text{PM}_{10}$  concentrations. The  $P_{\text{SO}_2\text{-heating}}$  and  $P_{\text{NO}_2\text{-heating}}$  values were 50 % and 33 %, respectively, and the  $P_{\text{SO}_2\text{-action}}$  and  $P_{\text{NO}_2\text{-action}}$  values were 5 % and 19 %. Note that the mean concentration of CO in Shijiazhuang city varied from  $2.2 \text{ mg}/\text{m}^3$  during the NCANHP to  $5.5 \text{ mg}/\text{m}^3$  during the ACA period, which showed an increasing tendency (Fig. 3). Because CO was mainly produced from the uncompleted combustion of fossil fuels, so the usage of domestic coal might be increasing with the gradual decrease of temperature from the NCANHP ( $8.4^\circ\text{C}$ ) to the ACA period ( $0.7^\circ\text{C}$ ) (Table 1). Meanwhile, it can also be inferred that the control of domestic coal during the TECA period in Shijiazhuang city performed little efficiency. Because of the lack of emission inventories for domestic coal or small-boiler coal in Shijiazhuang, so that the control measures were less targeted. Additionally, the concentrations of  $\text{O}_3$  during different stages of TECA were lower compared to other pollutants (Figs. 2 and 3). Overall, the control measures of emission sources in Shijiazhuang during the TECA period were go into effect, while the coal heating for cold winter and the unfavorably meteorological conditions during the CAHP had an offset effect on the efforts of control measures for pollutant sources to some extent. The average wind speed during the CAHP ( $0.4 \text{ m/s}$  on average) was lower than those during the other stages of the TECA period ( $0.5\text{-}0.7 \text{ m/s}$  on average) (Table 1), and the wind directions were changeable (Fig. S1), which was in favor of the accumulation of atmospheric pollutants, and thus

causing the concentrations of atmospheric pollutants to increase during the CAHP. Note that the heights of mixed layer showed an apparently decreasing tendency from the NCANHP (540 m on average) and the NCAHP (590 m on average) to the ACA (431 m on average), and the height of mixed layer during the CAHP was only 474 m on average (Table 1). The decrease in the height of mixed layer can cause the concentrations of atmospheric pollutants near the ground to be compressed significantly and enhanced subsequently. In addition, during the CAHP, the multidirectional air-masses that were mainly originated from the Beijing-Tianjin-Hebei and its surrounding areas (e.g. Henan, Shandong and south of Hebei) displayed an overlap with each other in Shijiazhuang (Fig. S7), and further aggravate the level of air pollution in Shijiazhuang.

**Fig. 2.** The variations of atmospheric pollutants concentrations during the four stages (NCANHP, NCAHP, CAHP and ACA) of the TECA period in Shijiazhuang.

**Fig. 3.** The concentrations variations of PM<sub>2.5</sub>, PM<sub>10</sub> and gaseous pollutants during the four stages (NCANHP, NCAHP, CAHP and ACA) of the TECA period in Shijiazhuang.

**Fig. 4.** The P<sub>i-heating</sub> and P<sub>i-action</sub> of PM<sub>2.5</sub>, PM<sub>10</sub> and gaseous pollutants (SO<sub>2</sub>, NO<sub>2</sub>, CO and O<sub>3</sub>) calculated by equation (8) and (9) in urban area and suburb in Shijiazhuang.

### 3.1.2 Spatial variation

The concentrations variations of PM<sub>2.5</sub>, PM<sub>10</sub> and related gaseous pollutants (SO<sub>2</sub>, NO<sub>2</sub>, CO and O<sub>3</sub>) during four stages (NCANHP, NCAHP, CAHP and ACA) in urban area and suburb in Shijiazhuang are shown in Figs. 3 and 5. During the NCANHP, the average concentrations of PM<sub>2.5</sub> in urban area and suburb were 166 µg/m<sup>3</sup> and 152 µg/m<sup>3</sup>, respectively. The concentrations of PM<sub>2.5</sub> in urban area and suburb increased significantly during the NCAHP (t-test,  $p < 0.01$ ). The meanly increased concentration of PM<sub>2.5</sub> (46 µg/m<sup>3</sup>) in urban area was higher than that of in suburb (43 µg/m<sup>3</sup>), but the value of P<sub>PM2.5-heating</sub> in suburb (29 %) was higher than that in urban area (27 %) (Fig. 4). Note that the mean concentration of PM<sub>2.5</sub> in urban area was up to 243 µg/m<sup>3</sup> during the CAHP, which showed an increasing tendency, and the P<sub>PM2.5-action</sub> value was -15 % (Fig. 4), likely due to the unfavorably meteorological conditions such as lower wind speed (0.4 m/s) and lower height of mixed layer (474 m), etc. (Table 1 and Fig. S7). Conversely, compared to the NCAHP, the concentrations of PM<sub>2.5</sub> in suburb (a mean of 161 µg/m<sup>3</sup>) decreased significantly during the CAHP (t-test,  $p < 0.01$ ), and the P<sub>PM2.5-action</sub> was up to 18 % (Fig. 4), indicating the control measures of PM<sub>2.5</sub> sources in suburb might be more effective than urban area. The tendency of SO<sub>2</sub> concentrations

during different stages of TECA (except the ACA period) was similar to that of  $PM_{2.5}$ . The  $P_{SO_2\text{-heating}}$  and  $P_{SO_2\text{-action}}$  values in urban area were up to 58 % and -4 %, respectively, and were up to 47 % and 8 % in suburb during the TECA period (Fig. 4). However, the concentrations of  $SO_2$  in urban area and suburb decreased remarkably during the ACA compared to the CAHP (t-test,  $p<0.01$ ), probably due to the effective control measures.

During the NCANHP, the average concentrations of  $PM_{10}$  in urban area and suburb were 280 and 242  $\mu g/m^3$ , respectively. Then, the meanly increased concentrations in urban area and suburb were up to 65 and 64  $\mu g/m^3$  during the NCAHP, which were comparable with each other. Nevertheless, the mean  $P_{PM_{10}\text{-heating}}$  value in suburb was higher (26 %) than that in urban area (23 %) (Fig. 4). During the CAHP, the meanly decreased concentration of  $PM_{10}$  in urban area was 1  $\mu g/m^3$ , and apparently lower than that of suburb (36  $\mu g/m^3$ ), as well as the mean  $P_{PM_{10}\text{-action}}$  values in urban area and suburb were 0.4 % and 12 %, respectively (Fig. 4). It can be seen that the control of  $PM_{10}$  sources in suburb was more effective compared to urban area, in case of exclusion of unfavorably meteorological conditions (Table 1 and Fig. S7), probably related to more than 700 enterprises closed down which mainly carried out ore mining and stone processing in suburb (Tables S1 and S5). The tendency of  $NO_2$  concentrations in urban area and suburb was similar to that of  $PM_{10}$  during different stages of TECA period. The mean  $P_{NO_2\text{-heating}}$  values in urban area and suburb were up to 31 % and 34 %, respectively; while the mean  $P_{NO_2\text{-action}}$  values in urban area and suburb were up to 17 % and 21 %, respectively. Note that the concentrations of CO in urban area and suburb showed an increasing tendency from the NCANHP (2.1-2.4  $mg/m^3$ ) to the ACA period (5.5  $mg/m^3$ ) (Fig. 3). The  $P_{CO\text{-heating}}$  and  $P_{CO\text{-action}}$  values in urban area were 22 % and -15 %, respectively, while those in suburb were 32 % and -20 % during the TECA period. In addition, as shown in Fig. 5, the concentrations of CO in the eastern and northern suburb in Shijiazhuang were significantly higher than those of urban areas (t-test,  $p<0.01$ ). Note that the concentrations of  $O_3$  in urban area and suburb were lower during different stages of TECA (Fig. 5). Overall, during the TECA period, the effect of control measures for atmospheric pollutants sources in suburb was better than in urban area, especially for the effect of control measures for particulate matters sources. The effect of control measures for CO was not notable during the TECA period, especially in suburb, likely due to the increasing usage of domestic coal in suburb along with the temperature decreasing (Table 1).

----



**Fig. 5.** The spatial variations of atmospheric pollutants (PM<sub>2.5</sub>, PM<sub>10</sub>, SO<sub>2</sub>, NO<sub>2</sub>, CO and O<sub>3</sub>) during the four stages (NCANHP, NCAHP, CAHP and ACA) of the TECA period in Shijiazhuang. The pictures were produced by ArcGIS based kriging interpolation method.

### 3.2 Variations of chemical species in PM<sub>2.5</sub>

The average concentrations of chemical species in PM<sub>2.5</sub> in Shijiazhuang during the whole sampling period are shown in Fig. 6. The annual mean concentrations of OC, SO<sub>4</sub><sup>2-</sup>, NO<sub>3</sub><sup>-</sup> and NH<sub>4</sub><sup>+</sup> in PM<sub>2.5</sub> were 43.1 µg/m<sup>3</sup>, 39.0 µg/m<sup>3</sup>, 33.6 µg/m<sup>3</sup> and 25.6 µg/m<sup>3</sup>, respectively, and their contributions to PM<sub>2.5</sub> were up to 23.1 %, 20.0 %, 17.3 % and 12.3 %, respectively. The annual mean concentrations of EC and Cl<sup>-</sup> were 11.7 µg/m<sup>3</sup> and 7.7 µg/m<sup>3</sup>, respectively, which accounted for 5.9 % and 4.1 % of PM<sub>2.5</sub>. Note that the annual mean concentrations of elements in PM<sub>2.5</sub> were relatively lower, which varied from 0.03 to 2.6 µg/m<sup>3</sup>, accounting for 0.02-2.4 % of PM<sub>2.5</sub>. Compared to other elements, the annual mean concentrations of Si (2.6 µg/m<sup>3</sup>) and Al (1.4 µg/m<sup>3</sup>) were relatively higher during the whole sampling period, which accounted for 2.4 % and 1.2 % of PM<sub>2.5</sub>, respectively. In this study, the annual mean concentrations of OC, SO<sub>4</sub><sup>2-</sup>, NO<sub>3</sub><sup>-</sup> and NH<sub>4</sub><sup>+</sup> in Shijiazhuang were clearly higher than Beijing (Gao et al., 2016), Tianjin (Wu et al., 2015), Jinan (Gao et al., 2011), Shanghai (Wang et al., 2016c), Chengdu (Tao et al., 2013b), Xian (Wang et al., 2015a), Hangzhou (Liu et al., 2015) and Heze (Liu et al., 2017a).

The values of P<sub>i-heating</sub> and P<sub>i-action</sub> of different chemical species in PM<sub>2.5</sub> were calculated by using the Eq. (8) and (9). The variations of chemical species in PM<sub>2.5</sub> at four stages of the TECA and the values of P<sub>i-heating</sub> and P<sub>i-action</sub> in Shijiazhuang are shown in Figs. 7 and 8. Compared to the NCANHP, the concentrations of chemical species during the NCAHP showed a significantly increased tendency (t-test,  $p < 0.01$ ), the concentrations of SO<sub>4</sub><sup>2-</sup>, Cl<sup>-</sup>, OC, EC, Si, Al, Ca<sup>2+</sup> and Mg<sup>2+</sup> increased by 7.9, 3.7, 6.7, 3.2, 1.6, 0.6, 0.4 and 0.1 µg/m<sup>3</sup>, respectively, and the P<sub>i-heating</sub> values of these species were up to 30.0 %, 40.2 %, 14.6 %, 22.1 %, 78.8 %, 63.5 %, 47.4 % and 45.9 %, respectively, during the NCAHP. As these species (i.e., SO<sub>4</sub><sup>2-</sup>, Cl<sup>-</sup>, OC, EC, Si, Al, Ca<sup>2+</sup> and Mg<sup>2+</sup>) were closely associated with coal combustion (Cao et al., 2011; Liu et al., 2015; Liu et al., 2016; Liu et al., 2017a, c), therefore, coal combustion for heating in winter probably had a great impact on increasing of these chemical species in PM<sub>2.5</sub>. Furthermore, compared to the NCANHP, the concentrations of Cr, Cu, Fe, Mn, Ti, Zn and Pb increased by 0.02, 0.02, 0.34, 0.02, 0.02, 0.28 and 0.07 µg/m<sup>3</sup>, respectively, and the P<sub>i-heating</sub> values of these species were 72.7 %, 33.1 %, 34.4 %, 72.7 %, 33.1 %, 34.4 % and 72.7 %, respectively.

21.0 %, 45.8 %, 48.3 % and 36.2 %, respectively, during the NCAHP. The Cr, Cu, Fe, Mn, Ti, Zn and Pb were closely related to industrial sources (Liu et al., 2015; Kabala and Singh, 2001; Morishita et al., 2011; Mansha et al., 2012; Yao et al., 2016), thus, the industrial emissions might have a higher influence on PM<sub>2.5</sub> during the NCAHP than that during the NCANHP. Also, it might be closely associated with the unfavorably meteorological factors (Table 1 and Fig. S7).

Compared to the NCAHP, the concentrations of SO<sub>4</sub><sup>2-</sup>, Cl<sup>-</sup>, OC and EC during the CAHP increased by 16.8, 0.3, 19.8 and 14.6 µg/m<sup>3</sup>, respectively, and the P<sub>i-action</sub> values of which were up to -48.8 %, -2.0 %, -37.3 % and -83.0 %, respectively, during the CAHP. As coal combustion was an important source of SO<sub>4</sub><sup>2-</sup>, Cl<sup>-</sup>, OC and EC (Cao et al., 2011; Liu et al., 2015; Liu et al., 2016; Liu et al., 2017a, c), so it can be inferred that the influence of coal combustion might increase apparently during the CAHP compared to the NCAHP, which was likely due to the increased usage of the coal for domestic heating with the reduction of temperature during winter (Table 1). Additionally, unfavorably meteorological conditions during the CAHP can have an offset effect on the control measures for coal-combustion sources. As also Fig. 5 shown that the concentrations of CO during the CAHP were higher than those during the NCAHP, especially in rural areas. Furthermore, OC and EC were associated with the vehicle exhaust (Liu et al., 2016; Liu et al., 2017a), thus, the effect of motor vehicle management and control measures during the CAHP might be offset by the unfavorably meteorological conditions to some extent during the CAHP (Table 1 and Fig. S7). However, compared to the NCAHP, the concentrations of Si, Al, Ca<sup>2+</sup> and Mg<sup>2+</sup> during the CAHP decreased by 1.1, 0.1, 0.6 and 0.1 µg/m<sup>3</sup>, respectively, and the P<sub>i-action</sub> values of which were up to 30.3 %, 4.5 %, 47.0 % and 45.2 %, respectively. As Si, Al, Ca<sup>2+</sup> and Mg<sup>2+</sup> were mainly originated from the crustal dust (Liu et al., 2016; Shen et al., 2010; Wang et al., 2015a; Yang et al., 2016b), therefore, the influence of crustal dust on PM<sub>2.5</sub> during the CAHP might decrease clearly compared to the NCAHP. That's closely related to the control measures of inhabitation of dust emission during the TECA period (as shown in section 2.5). In general, from the view of the variation of PM<sub>2.5</sub> speciation, there was no doubt that the TECA had a certain positive environmental effect on the improvement of air quality. However, the ambient pollutant concentration was impacted by not only the emission sources, but also the meteorological conditions, regional background level and distant transportation, it was understandable that the concentration of CO had a “rebound” effect during the CAHP as the height of mixing layer was only 474 m and a low wind

speed of 0.4 m/s.

----

**Fig. 6.** The average concentrations and percentages of chemical species in PM<sub>2.5</sub> in Shijiazhuang during the whole sampling period: November 24, 2015 to January 9, 2017.

**Fig. 7.** The variations of chemical species in PM<sub>2.5</sub> during the four stages (NCANHP, NCAHP, CAHP and ACA) of the TECA period.

**Fig. 8.** The P<sub>i</sub>-heating and P<sub>i</sub>-action of chemical species in PM<sub>2.5</sub> during the TECA period in Shijiazhuang.

----

### 3.3 Variations of PM<sub>2.5</sub> sources contributions

The filter membrane samples of PM<sub>2.5</sub> were collected in three sites (LQ, LC and TSMS) in Shijiazhuang from November 24, 2015 to January 9, 2017, and source apportionment was carried out by using EPA PMF 5.0, as well as five factors were identified during the period (Figs. 9 and 10). The chemical profile of factor 1 was mainly represented by Si (72.3 %), Ca<sup>2+</sup> (74.0 %), Mg<sup>2+</sup> (43.9 %) and Al (71.3 %), which were derived mainly from crustal dust (Liu et al., 2016; Shen et al., 2010; Wang et al., 2015a). Thus, factor 1 was viewed as crustal dust. The contribution proportions of factor 1 to PM<sub>2.5</sub> decreased from 19.5 % (38.5 µg/m<sup>3</sup>) during the WY, 18.7 % (42.1 µg/m<sup>3</sup>) during the NCANHP, 16.9 % (48.0 µg/m<sup>3</sup>) during the NCAHP to 15.0 % (40.3 µg/m<sup>3</sup>) during the CAHP, and increased up to 16.3 % (48.3 µg/m<sup>3</sup>) during the ACA. The main species of factor 2 were SO<sub>4</sub><sup>2-</sup> (53.9 %), NO<sub>3</sub><sup>-</sup> (89.8 %) and NH<sub>4</sub><sup>+</sup> (75.0 %). Therefore, it was easily identified as secondary sources (Liu et al., 2015, 2016, 2017a; Santacatalina et al., 2010; Srimuruganandam and Nagendra, 2012). The contribution proportions of factor 2 to PM<sub>2.5</sub> ranged from 29.5 % (66.4 µg/m<sup>3</sup>) during the NCANHP, 30.8 % (87.9 µg/m<sup>3</sup>) during the NCAHP, 31.6 % (84.8 µg/m<sup>3</sup>) during the CAHP to 32.7 % (64.6 µg/m<sup>3</sup>) during the WY, and decreased to 28.8 % (85.2 µg/m<sup>3</sup>) during the ACA. Factor 3 was represented by the relatively high loadings of OC (55.9 %), EC (70.9 %), Cu (26.9 %) and Zn (26.5 %). Given that the OC and EC are generally predominant in the reported source profile of vehicle exhaust (Liu et al., 2016, 2017a; Yao et al., 2016), and Zn is widely used as an additive for lubricant in two-stroke engines, and Cu is closely associated with brake wear (Begum et al., 2004; Canha et al., 2012; Lin et al., 2015; Liu et al., 2017a). Therefore, factor 3 was identified as vehicle emissions. The contribution proportions of factor 3 to PM<sub>2.5</sub> decreased from 14.2 % (32.0 µg/m<sup>3</sup>) during the NCANHP, 13.4 % (26.4 µg/m<sup>3</sup>) during the WY, 13.3 % (37.8 µg/m<sup>3</sup>) during the NCAHP to 10.6 % (28.5 µg/m<sup>3</sup>) during the CAHP, and increased to 14.1 % (41.7 µg/m<sup>3</sup>) during the ACA.

Factor 4 was characterized by the high contributions of  $\text{Ca}^{2+}$  (26.0 %),  $\text{Mg}^{2+}$  (31.0 %), Si (13.3 %), As (84.9 %),  $\text{Cl}^-$  (38.6 %), OC (20.2 %) and  $\text{SO}_4^{2-}$  (26.7 %), and the combination of these species in factor 4 inferred they were co-emission from coal combustion (Cao et al., 2011; Liu et al., 2015, 2016, 2017a,c; Zhang et al., 2011). Therefore, factor 4 was identified as coal combustion. The contribution proportions of factor 4 to  $\text{PM}_{2.5}$  increased from 26.2 % ( $51.7 \mu\text{g}/\text{m}^3$ ) during the WY, 28.0 % ( $63.2 \mu\text{g}/\text{m}^3$ ) during the NCANHP, 29.5 % ( $84.0 \mu\text{g}/\text{m}^3$ ) during the NCAHP to 31.7 % ( $85.2 \mu\text{g}/\text{m}^3$ ) during the CAHP, and lightly increased to 32.6 % ( $96.3 \mu\text{g}/\text{m}^3$ ) during the ACA. Factor 5 was identified as industrial emissions, with high loadings of Cr (66.7 %), Cu (63.7 %), Fe (83.2 %), Mn (51.3 %), Ti (70.0 %), Zn (69.2 %), Pb (42.1 %) and  $\text{Cl}^-$  (41.0 %) (Almeida et al., 2015; Liu et al., 2015, 2016; Morishita et al., 2011; Mansha et al., 2012; Yao et al., 2016). The contribution proportions of factor 5 to  $\text{PM}_{2.5}$  ranged from 5.0 % ( $11.3 \mu\text{g}/\text{m}^3$ ) during the NCANHP, 5.1 % ( $10.0 \mu\text{g}/\text{m}^3$ ) during the WY to 5.9 % ( $16.7 \mu\text{g}/\text{m}^3$ ) during the NCAHP, and decreased to 5.3 % ( $14.2 \mu\text{g}/\text{m}^3$ ) during the CAHP and 4.9 % ( $14.4 \mu\text{g}/\text{m}^3$ ) during the ACA. Note that the contribution of industrial emissions to  $\text{PM}_{2.5}$  was relatively lower than other sources (Fig. 10).

In general, crustal dust, secondary sources, vehicle emissions, coal combustion and industrial emissions were identified as  $\text{PM}_{2.5}$  sources in Shijiazhuang (Fig. 9). Compared to the WY and NCANHP, the contribution concentrations and proportions of coal combustion to  $\text{PM}_{2.5}$  increased significantly during other stages of TECA period (Fig. 10), which was closely associated with the coal heating for cold winter (Liu et al., 2016), and the unfavorably meteorological conditions (Table 1 and Fig. S7). The contribution concentrations and proportions of crustal dust and vehicle emissions to  $\text{PM}_{2.5}$  decreased apparently during the CAHP compared to other stages of TECA period (Fig. 10). It indicated that the control effects of motor vehicles and crustal dust were remarkable during the CAHP, even under unfavorably meteorological conditions (Table 1), and the results were consistent with the above analysis. The contribution proportions of secondary sources to  $\text{PM}_{2.5}$  during the CAHP showed little change compared to other stages of TECA period (Fig. 10). However, compared to the WY and NCANHP, the contribution concentrations of secondary sources to  $\text{PM}_{2.5}$  increased significantly during the NCAHP, CAHP and the ACA (Fig. 10), likely due to high concentrations of gaseous precursors (i.e.,  $\text{SO}_2$  and  $\text{NO}_2$ ) (Fig. 5), unfavorably meteorological conditions (Table 1), and frequent hazy events during these periods, when there were significant secondary reactions (Han et al., 2014; Li et al., 2016a). In addition, it also illustrated that the

discharge of atmospheric pollutants might be still enormous even under such strict control measures. Note that the contribution concentrations and proportions of industrial emissions to PM<sub>2.5</sub> during the CAHP decreased apparently compared to the NCAHP (Fig. 10), indicating that the control of industrial emissions was also effective during the CAHP.

Chen et al. (2016b) reported that the concentrations of particles during the 2014 Youth Olympic Games (YOG) period (August) were much lower than before-Games period (July) and after-Games period (September); and fugitive dusts, construction dusts and secondary sulfate aerosol decreased obviously in YOG, which means mitigation measures have played an effective role in reduction of particulate matter. Wang et al. (2017) found that the contributions of vehicles, industrial sources, fugitive dust, and other sources decreased 13.5-14.7 %, 10.7-11.2 %, 4.5-5.6 % and 1.7-2.7 %, respectively, during the Asia-Pacific Economic Cooperation (APEC) and China's Grand Military Parade (CGMP), compared to the period before the control actions. Guo et al. (2013) found that primary vehicle contributions were reduced by 30 % at the urban site and 24 % at the rural site, compared with the non-controlled period before the Beijing 2008 Olympics. The reductions in coal combustion contributions were 57 % at PKU site and 7 % at Yufa site. As we can see that these control-actions of the strict measures taken for emission sources during the international events held in China, including the TECA in Shijiazhuang, were all very important practical exercises and rarely scientific experiments. However, it cannot be advocated as the normalized control measures for atmospheric pollution in China. These strict measures taken during these periods are temporary, and there is a normal recovery of all the emissions of sources after the operation. Once adverse weather conditions occur, and the hazy events may continue to happen eventually. In short, the direct cause of the severe atmospheric pollution in China is that the emission of pollutants beyond the air environment's self-purification capacity, and the essential reason is unreasonable and unhealthy pattern for economic development of China.

----

**Fig. 9.** Source profiles obtained with the PMF for PM<sub>2.5</sub>. Filled bars identify the species that mainly characterize each factor profile.

**Fig. 10.** Source contributions of PM<sub>2.5</sub> during different stages in Shijiazhuang. WY represents whole year; November 24, 2015 to January 9, 2017.

----

### 3.4 Backward trajectory and PSCF analysis

The backward trajectory analysis was used to identify the transport pathways of the air mass during the CAHP. In terms of the directions and travelled areas, these trajectories were divided into the five groups (Fig. 11). Trajectory clusters 1, accounting for 31.3 % of the total, originated from Shanxi province and passed over North of Hebei before arriving at Shijiazhuang. Trajectory cluster 1 reflected the features of small-scale, short-distance air mass transport (Fig. 11). The higher concentrations of  $\text{PM}_{10}$  ( $358 \mu\text{g}/\text{m}^3$ ),  $\text{PM}_{2.5}$  ( $237 \mu\text{g}/\text{m}^3$ ) and  $\text{CO}$  ( $3.9 \mu\text{g}/\text{m}^3$ ) might be due to the variety of emission sources and the accumulation of pollutants from surrounding areas, since the moving speed of air mass in cluster 1 was much lower than other trajectories (Fig. 11 and Table 2). Trajectory cluster 2, 3 and 4 accounted for 58.0 % of the total trajectories, and began from the northwest of China, passed through the Inner Mongolia and Shanxi, showing the features of large-scale, long-distance air transports. The relative lower concentrations of  $\text{PM}_{10}$  ( $189\text{--}290 \mu\text{g}/\text{m}^3$ ),  $\text{PM}_{2.5}$  ( $119\text{--}181 \mu\text{g}/\text{m}^3$ ),  $\text{SO}_2$  ( $50\text{--}67 \mu\text{g}/\text{m}^3$ ),  $\text{NO}_2$  ( $58\text{--}78 \mu\text{g}/\text{m}^3$ ) and  $\text{CO}$  ( $2.1\text{--}3.0 \text{ mg}/\text{m}^3$ ) were closely associated with high moving speeds of air mass (Fig. 11 and Table 2), and relatively less anthropogenic emission sources in the northwest of China. Trajectory cluster 5 was mainly originated from Ningxia province, passed over Shaanxi, Shanxi and Hebei before arriving at Shijiazhuang, accounting for 10.8 % of the total, showing the features of small-scale, short-distance air transport significantly elevated levels of  $\text{PM}_{10}$  ( $451 \mu\text{g}/\text{m}^3$ ),  $\text{PM}_{2.5}$  ( $303 \mu\text{g}/\text{m}^3$ ),  $\text{SO}_2$  ( $83 \mu\text{g}/\text{m}^3$ ),  $\text{NO}_2$  ( $104 \mu\text{g}/\text{m}^3$ ) and  $\text{CO}$  ( $4.8 \text{ mg}/\text{m}^3$ ) with trajectory cluster 5 were associated with the sources and the accumulation of pollutants from surrounding areas. As well known that the Beijing-Tianjin-Hebei region was one of the severest polluted areas in China (Bi et al., 2014; Chen et al., 2013; Gu et al., 2011; Wang et al., 2014; Zhao et al., 2012), it might be an important reason why the concentrations of pollutants were higher with trajectory clusters 1 and 5 (Fig. 11 and Table 2).

In this study, PSCF model was used to analyze the potential sources-areas of atmospheric pollutants by combining backward trajectories and the concentrations of atmospheric pollutants in Shijiazhuang during the CAHP, and the results were shown in Fig. 12. The values of weighted potential source contribution function (WPSCF) of  $\text{CO}$  were higher in the north of Shaanxi, south of Shanxi and central and southern Inner Mongolia, which were mainly potential sources-areas of  $\text{CO}$  concentrations in Shijiazhuang (Fig. 12 (a)). The WPSCF values of  $\text{NO}_2$  were higher in north of Henan and Shaanxi, Hebei, Shanxi, and central and southern Inner Mongolia, which were mainly

potential sources-areas of NO<sub>2</sub> concentrations in Shijiazhuang (Fig. 12 (b)). The WPSCF values of O<sub>3</sub> and SO<sub>2</sub> were higher in the north of Henan and Shaanxi, Shanxi, and south of Hebei, which were distinguished as major potential sources-areas of O<sub>3</sub> and SO<sub>2</sub> concentrations in Shijiazhuang (Fig. 12 (c) and (d)). Moreover, the southwest of Shandong was also identified as mainly potential sources-areas of SO<sub>2</sub> concentrations in Shijiazhuang. As for PM<sub>2.5</sub> and PM<sub>10</sub>, the WPSCF values were higher in south of Hebei, and east of Shanxi, which were identified as mainly potential sources-areas of PM<sub>2.5</sub> and PM<sub>10</sub> concentrations in Shijiazhuang (Fig. 12 (e) and (f)). Overall, the potential sources-areas of the atmospheric pollutants in Shijiazhuang mainly concentrated in the surrounding regions of Shijiazhuang, including south of Hebei, north of Henan and Shanxi. Previous studies also reported that Shanxi, Hebei and Henan provinces had serious air pollution problems (Feng et al., 2016; Kong et al., 2013; Meng et al., 2016; Zhu et al., 2011), revealing the regional nature of the atmospheric pollution in Northern Plain of China. Therefore, there is an urgent need for making cross-boundary control policy except for local control-measures given the high background level of pollutants.

----  
**Fig. 11.** Five clusters of the 72-h air mass backward trajectories during the CAHP. Red star represents Shijiazhuang city.

**Fig. 12.** Potential sources areas of atmospheric pollutants obtained from PSCF model during the CAHP. Red star represents Shijiazhuang city. The colors represent potential sources-areas influenced on the atmospheric pollutants, and the red color could be determined to be relatively important sources-areas while the blue color means unimportant potential sources-areas.

**Table.2** The average concentrations of atmospheric pollutants in different clusters during the CAHP.

## 4 Conclusions

The control measures of atmospheric pollution in Shijiazhuang were effective and was in a right direction. Under unfavorably meteorological conditions, the mean concentrations of PM<sub>2.5</sub>, PM<sub>10</sub>, SO<sub>2</sub>, NO<sub>2</sub>, and chemical species (Si, Al, Ca<sup>2+</sup>, Mg<sup>2+</sup>) in PM<sub>2.5</sub> during the CAHP significantly decreased compared to the NCAHP. Overall, the effects of control measures in suburbs were better than in urban area, especially for the effects of control measures for particulate matters sources. The effects of control measures for CO emission sources were not apparent during the CAHP, especially in suburbs.

The pollutant's emission sources during the CAHP were in effective control, especially for

crustal dust and vehicles. While the necessary coal heating for cold winter and the unfavorably meteorological conditions had an offset effect on the control measures for emission sources to some extent. The discharge of pollutants might be still enormous even under such strict control measures.

The backward trajectory and PSCF analysis in the light of atmospheric pollutants suggested that the potential sources-areas mainly concentrated in surrounding regions of Shijiazhuang, i.e., south of Hebei, north of Henan and Shanxi. The regional nature of the atmospheric pollution in Northern China Plain revealed that there is an urgent need for making cross-boundary control policy except for local control-measures given the high background level of pollutants.

The TECA is an important practical exercise but it can't be advocated as the normalized control measures for atmospheric pollution in China. The direct cause of atmospheric pollution in China is the emission of pollutants exceeds the air environment's self-purification capacity, and the essential reason is unreasonable and unhealthy pattern for economic development of China.

## **Acknowledgments**

This study was financially supported by the National Key Research and Development Program of China (2016YFC0208500 & 2016YFC0208501) and Tianjin Science and Technology Foundation (16YFZCSF00260) and the National Natural Science Foundation of China (21407081) and the Fundamental Research Funds for the Central Universities. The authors thank Shijiazhuang Environmental Protection Monitoring Station for their participating in the sampling campaign and chemical analysis of samples.

## **Reference**

- Almeida, S.M., Lage, J., Fernández, B., Garcia, S., Reis, M.A., and Chaves, P.C.: Chemical characterization of atmospheric particles and source apportionment in the vicinity of a steelmaking industry, *Sci. Total Environ.*, 521–522, 411–420, 2015.
- Ancelet, T., Davy, P.K., Mitchell, T., Trompette, W.J., Markwitz, A., and Weatherburn, D.C.: Identification of particulate matter sources on an hourly time-scale in a wood burning community, *Environ. Sci. Technol.*, 46, 4767–4774, 2012.
- Begum, B.A., Kim, E., Biswas, S.K., and Hopke, P.K.: Investigation of sources of atmospheric aerosol at urban and semi-urban areas in Bangladesh, *Atmos. Environ.*, 38, 3025–3038, 2004.
- Bi, J.R., Huang, J.P., Hu, Z.Y., Holben, B.N., and Guo, Z.Q.: Investigating the aerosol optical and radiative characteristics of heavy haze episodes in Beijing during January of 2013, *J. Geophys.*



693 Res. Atmos., 119, 9884–9900, 2014.

694 Brown, S.G., Eberly, S., Paatero, P., and Norris, G.A.: Methods for estimating uncertainty in PMF  
695 solutions: examples with ambient air and water quality data and guidance on reporting PMF  
696 results, *Sci. Total Environ.*, 518–519, 626–635, 2015.

697 Canha, N., Freitas, M.C., Almeida-Silva, M., Almeida, S.M., Dung, H.M., Dionísio, I., Cardoso, J.,  
698 Pio, C.A., Caseiro, A., Verburg, T.G., and Wolterbeek, H.T.: Burn wood influence on outdoor  
699 air quality in a small village: Foros de Arrão, Portugal, *J. Radioanal. Nucl. Chem.*, 291, 83–88,  
700 2012.

701 Cao, J.J., Chow, J.C., Tao, J., Lee, S.C., Watson, J.G., Ho, K.F., Wang, G.H., Zhu, C.S., and Han,  
702 Y.M.: Stable carbon isotopes in aerosols from Chinese cities: influence of fossil fuels, *Atmos.*  
703 *Environ.*, 45, 1359–1363, 2011.

704 Chen, X., Balasubramanian, R., Zhu, Q.Y., Behera, S.N., Bo, D.D., Huang, X., Xie, H.Y., and Cheng,  
705 J.P.: Characteristics of atmospheric particulate mercury in size-fractionated particles during  
706 haze days in Shanghai, *Atmos. Environ.*, 131, 400–408, 2016a.

707 Chen, P.L., Wang, T.J., Lu, X.B., Yu, Y.Y., Kasoar, M., Xie, M., and Zhuang, B.L.: Source  
708 apportionment of size-fractionated particles during the 2013 Asian Youth Games and the 2014  
709 Youth Olympic Games in Nanjing, China, *Sci. Total Environ.*, 579, 860, 2016b.

710 Chen, H. and Wang, H.: Haze Days in North China and the associated atmospheric circulations  
711 based on daily visibility data from 1960 to 2012, *J. Geophys. Res. Atmos.*, 120, 5895–5909,  
712 2015.

713 Chen, R., Zhao, Z., and Kan, H.: Heavy smog and hospital visits in Beijing, China, *Am. J. Respir.*  
714 *Crit. Care Med.*, 188, 1170–1171, 2013.

715 Cheng, Y., He, K.B., Du, Z.Y., Zheng, M., Duan, F.K., and Ma, Y.L.: Humidity plays an important  
716 role in the PM<sub>2.5</sub> pollution in Beijing, *Environ. Pollut.*, 197, 68–75, 2015.

717 Dimitriou, K., Remoundaki, E., Mantas, E., and Kassomenos, P.: Spatial distribution of source areas  
718 of PM<sub>2.5</sub> by Concentration Weighted Trajectory (CWT) model applied in PM<sub>2.5</sub> concentration  
719 and composition data, *Atmos. Environ.*, 116, 138–145, 2015.

720 Du, W. P., Wang, Y. S., Song, T., Xin, J. Y., Cheng, Y. S., and Ji, D. S.: Characteristics of atmospheric  
721 pollutants during the period of summer and autumn in Shijiazhuang, *Environ. Sci.*, 31, 1409–  
722 1416, 2010. (In Chinese)

Feng, J. L., Yu, H., Su, X. F., Liu, S. H., Li, Y., Pan, Y. P., and Sun, J. H.: Chemical composition and source apportionment of PM<sub>2.5</sub> during Chinese Spring Festival at Xinxiang, a heavily polluted city in North China: fireworks and health risks, *Atmos. Res.*, 182, 176–188, 2016.

Fu, G. Q., Xu, W. Y., Rong, R. F., Li, J. B., and Zhao, C. S.: The distribution and trends of fog and haze in the North China Plain over the past 30 years, *Atmos. Chem. Phys.*, 14, 11949–11958, 2014.

Fu, H. B., and Chen, J. M.: Formation, features and controlling strategies of severe haze-fog pollutions in China, *Sci. Total Environ.*, 578, 121–138, 2017.

Gao, J., Peng, X., Chen, G., Xu, J., Shi, G. L., Zhang, Y. C., and Feng, Y. C.: Insights into the chemical characterization and sources of PM<sub>2.5</sub> in Beijing at a 1-h time resolution, *Sci. Total Environ.*, 542, 162–171, 2016.

Gao, M., Guttikunda, S. K., Carmichael, G. R., Wang, Y., Liu, Z., Stanier, C. O., Saide, P. E., and Yu, M.: Health impacts and economic losses assessment of the 2013 severe haze event in Beijing area, *Sci. Total Environ.*, 511C, 553–561, 2015.

Gao, X. M., Yang, L. X., Cheng, S. H., Gao, R., Zhou, Y., Xue, L. K., Shou, Y. P., Wang, J., Wang, X. F., Nie, W., Xu, P. J., and Wang, W. X.: Semi-continuous measurement of water-soluble ions in PM<sub>2.5</sub> in Jinan, China: Temporal variations and source apportionments, *Atmos. Environ.*, 45, 6048–6056, 2011.

Gu, J. X., Bai, Z. P., Li, A. X., Wu, L. P., Xie, Y. Y., Lei, W. F., Dong, H. Y., and Zhang, X.: Chemical composition of PM<sub>2.5</sub> during winter in Tianjin, China, *Particuology*, 9, 215–221, 2011.

Guo, S., Hu, M., Guo, Q., Zhang, X., Schauer, J. J., and Zhang, R.: Quantitative evaluation of emission controls on primary and secondary organic aerosol sources during Beijing 2008 Olympics, *Atmos. Chem. Phys.*, 13, 8303–8314, 2013.

Han, S. Q., Wu, J. H., Zhang, Y. F., Cai, Z. Y., Feng, Y. C., Yao, Q., Li, X. J., Liu, Y. W., and Zhang, M.: Characteristics and formation mechanism of a winter haze-fog episode in Tianjin, China, *Atmos. Environ.*, 98, 323–330, 2014.

Hao, T. Y., Han, S. Q., Chen, S. C., Shan, X. L., Zai, Z. Y., Qiu, X. B., Yao, Q., Liu, J. L., Chen, J., and Meng, L. H.: The role of fog in haze episode in Tianjin, China: A case study for November 2015, *Atmos. Res.*, 194, 235–244, 2017.

Jiang, B. F., and Xia, D. H.: Role identification of NH<sub>3</sub> in atmospheric secondary new particle

formation in haze occurrence of China, *Atmos. Environ.*, 163, 107–117, 2017.

Kabala, C., and Singh, B.R.: Fractionation and mobility of copper, lead, and zinc in soil profiles in the vicinity of a copper smelter, *J. Environ. Qual.*, 30, 485–492, 2001.

Kong, X. Z., He, W., Qin, N., He, Q. S., Yang, B., Ouyang, H. L., Wang, Q. M., and Xu, F. L.: Comparison of transport pathways and potential sources of PM<sub>10</sub>, in two cities around a large Chinese lake using the modified trajectory analysis, *Atmos. Res.*, 122, 284–297, 2013.

Lee, H., Honda, Y., Hashizume, M., Guo, Y. L., Wu, C. F., Kan, H., Jung, K., Lim, Y. H., Yi, S., and Kim, H.: Short-term exposure to fine and coarse particles and mortality: a multicity time-series study in East Asia, *Environ. Pollut.*, 207, 43–51, 2015.

Li, J. J., Wang, G. H., Ren, Y. Q., Wang, J. Y., Wu, C., Han, Y. N., Zhang, L., Cheng, C. L., and Meng, J. J.: Identification of chemical compositions and sources of atmospheric aerosols in Xi'an, inland China during two types of haze events, *Sci. Total Environ.*, 566–567, 230–237, 2016a.

Li, H. M., Wang, Q. G., Shao, M., Wang, J. H., Wang, C., Sun, Y. X., Qian, X., Wu, H. F., Yang, M., and Li, F. Y.: Fractionation of airborne particulate bound elements in haze-fog episode and associated health risks in a megacity of southeast China, *Environ. Pollut.*, 208, 655–662, 2016b.

Li, M., Tang, G. Q., Huang, J., Liu, A. R., An, J. L., and Wang, Y. S.: Characteristics of winter atmospheric mixing layer height in Beijing-Tianjin-Hebei region and their relationship with the atmospheric pollution, *Environ. Sci.*, 36, 1935–1943, 2015. (In Chinese)

Lin, Y.-C., Tsai, C.-J., Wu, Y.-C., Zhang, R., Chi, K.-H., Huang, Y.-T., Lin, S.-H., and Hsu, S.-C.: Characteristics of trace metals in traffic-derived particles in Hsuehshan Tunnel, Taiwan: size distribution, potential source, and finger printing metal ratio, *Atmos. Chem. Phys.*, 15, 4117–4130, 2015.

Liu, B. S., Wu, J. H., Zhang, J. Y., Wang, L., Yang, J. M., Liang, D. N., Dai, Q. L., Bi, X. H., Feng, Y. C., Zhang, Y. F., and Zhang, Q.X.: Characterization and source apportionment of PM<sub>2.5</sub> based on error estimation from EPA PMF 5.0 model at a medium city in China, *Environ. Pollut.*, 222, 10–22, 2017a.

Liu, B. S., Yang, J. M., Yuan, J., Wang, J., Dai, Q. L., Li, T. K., Bi, X. H., Feng, Y. C., Xiao, Z. M., Zhang, Y. F., and Xu, H.: Source apportionment of atmospheric pollutants based on the online data by using PMF and ME2 models at a megacity, China, *Atmos. Res.*, 185, 22–31, 2017b.

783 Liu, B. S., Li, T. K., Yang, J. M., Wu, J. H., Gao, J. X., Bi, X. H., Feng, Y. C., Zhang, Y. F., and  
 784 Yang, H. H.: Source apportionment and a novel approach of estimating regional contributions  
 785 to ambient PM<sub>2.5</sub> in Haikou, China, *Environ. Pollut.*, 223, 334–345, 2017c.  
 786 Liu, B. S., Song, N., Dai, Q. L., Mei, R. B., Sui, B. H., Bi, X. H., and Feng, Y. C.: Chemical  
 787 composition and source apportionment of ambient PM<sub>2.5</sub> during the non-heating period in  
 788 Taian, China, *Atmos. Res.*, 170, 23–33, 2016.  
 789 Liu, G., Li, J. H., Wu, D., and Xu, H.: Chemical composition and source apportionment of the  
 790 ambient PM<sub>2.5</sub> in Hangzhou, China, *Particuology*, 18, 135–143, 2015.  
 791 Liu, H., Wang, X. M., Zhang, J. P., He, K. B., Wu, Y., and Xu, J. Y.: Emission controls and changes  
 792 in air quality in Guangzhou during the Asian Games, *Atmos. Environ.*, 76, 81–93, 2013.  
 793 Mansha, M., Ghauri, B., Rahman, S., and Amman, A.: Characterization and source apportionment  
 794 of ambient air particulate matter (PM<sub>2.5</sub>) in Karachi, *Sci. Total Environ.*, 425, 176–183, 2012.  
 795 Ma, Z.Z., Li, Z., Jiang, J.K., Ye, Z.X., Deng, J.G., and Duan, L.: Characteristics of water-soluble  
 796 inorganic ions in PM<sub>2.5</sub> emitted from coal fired power plants, *Environ. Sci.*, 36, 2361–2366,  
 797 2015. (In Chinese)  
 798 Meng, C. C., Wang, L. T., Zhang, F. F., Wei, Z., Ma, S. M., Ma, X., and Yang, J.: Characteristics of  
 799 concentrations and water-soluble inorganic ions in PM<sub>2.5</sub> in Handan City, Hebei province, China,  
 800 *Atmos. Res.*, 171, 133–146, 2016.  
 801 Morishita, M., Gerald, J., Keeler, G.J., Kamal, A.S., Wagner, J.G., Harkema, J.R., and Rohr, A.C.:  
 802 Source identification of ambient PM<sub>2.5</sub> for inhalation exposure studies in Steubenville, Ohio  
 803 using highly time-resolved measurements, *Atmos. Environ.*, 45, 7688–7697, 2011.  
 804 Paatero, P.: User's Guide for Positive Matrix Factorization Programs PMF2 and PMF3, Part 1:  
 805 Tutorial. University of Helsinki, Finland (February), 2000.  
 806 Paatero, P., and Hopke, P.K.: Discarding or down-weighting high-noise variables in factor analytic  
 807 models, *Anal. Chim. Acta*, 490, 277–289, 2003.  
 808 Paatero, P., and Tapper, U.: Positive matrix factorization: a non-negative factor model with optimal  
 809 utilization of error estimates of data values, *Environ. Metrics.*, 5, 111–126, 1994.  
 810 Pan, Q., Yu, Y., Tang, Z., Xi, M., and Zang, G.: Haze, a hotbed of respiratory-associated infectious  
 811 diseases, and a new challenge for disease control and prevention in China, *Am. J. Infect.*  
 812 *Control*, 42, 688, 2014.

813 Peng, W., Yang, J. N., Wagner, F., and Mauzerall, D. L.: Substantial air quality and climate co-  
 814 benefits achievable now with sectoral mitigation strategies in China, *Sci. Total Environ.*, 598,  
 815 1076–1084, 2017.

816 Qin, K., Wu, L. X., Wong, M. S., Letu, H., Hu, M. Y., Lang, H. M., Sheng, S. J., Teng, J. Y., Xiao,  
 817 X., and Yuan, L. M.: Trans-boundary aerosol transport during a winter haze episode in China  
 818 revealed by ground-based Lidar and CALIPSO satellite, *Atmos. Environ.*, 141, 20–29, 2016.

819 Quinn, P. K., and Bates, T. S.: North American, Asian, and Indian haze: similar regional impacts on  
 820 climate? *Geophys. Res. Lett.*, 30, 193–228, 2003.

821 Santacatalina, M., Reche, C., Minguillón, M. C., Escrig, A., Sanfelix, V., Carratalá, A., Nicolás, J.  
 822 F., Yubero, E., Crespo, J., Alastuey, A., Monfort, E., Miró, J. V., and Querol, X.: Impact of  
 823 fugitive emissions in ambient PM levels and composition: A case study in Southeast Spain, *Sci.*  
 824 *Total Environ.*, 408, 4999–5009, 2010.

825 Shafer, M. M., Toner, B. M., Overdier, J. T., Schauer, J. J., Fakra, S. C., Hu, S., Herner, J. D., and  
 826 Ayala, A.: Chemical speciation of vanadium in particulate matter emitted from diesel vehicles  
 827 and urban atmospheric aerosols, *Environ. Sci. Technol.*, 46, 189–195, 2012.

828 Shen, Z. X., Cao, J., Arimoto, R., Han, Y. M., Zhu, C.S., Tian, J., and Liu, S. X.: Chemical  
 829 characteristics of fine particles (PM<sub>1</sub>) from Xi'an, China, *Aerosol Sci. Technol.*, 44, 461–472,  
 830 2010.

831 Shen, X. J., Sun, J. Y., Zhang, X. Y., Zhang, Y. M., Zhang, L., Che, H. C., Ma, Q. L., Yu, X. M., Yue,  
 832 Y., and Zhang, Y. W.: Characterization of submicron aerosols and effect on visibility during a  
 833 severe haze-fog episode in Yangtze River Delta, China, *Atmos. Environ.*, 120, 307–316, 2015.

834 Srimuruganandam, B., and Nagendra, S. M. S.: Application of positive matrix factorization in  
 835 characterization of PM<sub>10</sub> and PM<sub>2.5</sub> emission sources at urban roadside, *Chemosphere*, 88, 120–  
 836 130, 2012.

837 Sun, X., Yin, Y., Sun, Y. W., Sun, Y., Liu, W., and Han, Y.: Seasonal and vertical variations in aerosol  
 838 distribution over Shijiazhuang, China, *Atmos. Environ.*, 81, 245–252, 2013.

839 Sun, Y. L., Wang, Z. F., Wild, O., Xu, W. Q., Chen, C., Fu, P. Q., Du, W., Zhou, L. B., Zhang, Q.,  
 840 Han, T. T., Wang, Q. Q., Pan, X. L., Zheng, H. T., Li, J., Guo, X. F., Liu, J. G., and Worsnop,  
 841 D. R.: “APEC Blue”: Secondary Aerosol Reductions from Emission Controls in Beijing. *Sci.*  
 842 *Rep.*, 6, 20668, 2016.

- Tai, A. P. K., Mickley, L. J., and Jacob, D. J.: Correlations between fine particulate matter (PM<sub>2.5</sub>) and meteorological variables in the United States: implications for the sensitivity of PM<sub>2.5</sub> to climate change, *Atmos. Environ.*, 44, 3976–3984, 2010.
- Tao, J., Zhang, L., Engling, G., Zhang, R., Yang, Y., Cao, J. J., Zhu, C. S., Wang, Q. Y., and Luo, L.: Chemical composition of PM<sub>2.5</sub> in an urban environment in Chengdu, China: importance of springtime dust storms and biomass burning, *Atmos. Res.*, 122, 270–283, 2013a.
- Tao, J., Cheng, T. T., Zhang, R. J., Cao, J. J., Zhu, L. H., Wang, Q. Y., Luo, L., and Zhang, L. M.: Chemical Composition of PM<sub>2.5</sub> at an Urban Site of Chengdu in Southwestern China, *Adv. Atmos. Sci.*, 30, 1070–1084, 2013b.
- Tao, M., Chen, L., Xiong, X., Zhang, M., Ma, P., Tao, J., and Wang, Z.: Formation process of the widespread extreme haze pollution over northern China in January 2013: Implications for regional air quality and climate, *Atmos. Environ.*, 98, 417–425, 2014.
- UNEP, United Nations Environmental Programme: Independent Environmental Assessment Beijing 2008 Olympic Games, Nairobi, Kenya, 2009, online available at: [http://www.unep.org/publications/UNEP-eBooks/BeijingReport\\_ebook.pdf](http://www.unep.org/publications/UNEP-eBooks/BeijingReport_ebook.pdf), last access: March 2010.
- Wang, G., Cheng, S. Y., Wei, W., Yang, X. W., Wang, X. Q. Jia, J., Lang, J. L., and Lv, Z.: Characteristics and emission-reduction measures evaluation of PM<sub>2.5</sub> during the two major events: APEC and Parade, *Sci. Total Environ.*, 595, 81–92, 2017.
- Wang, G., Zhang, R., Gomez, M. E., Yang, L., Levy Zamora, M., Hu, M., Lin, Y., Peng, J., Guo, S., Meng, J., Li, J., Cheng, C., Hu, T., Ren, Y., Wang, Y., Gao, J., Cao, J., An, Z., Zhou, W., Li, G., Wang, J., Tian, P., Marrero-Ortiz, W., Secrest, J., Du, Z., Zheng, J., Shang, D., Zeng, L., Shao, M., Wang, W., Huang, Y., Wang, Y., Zhu, Y., Li, Y., Hu, J., Pan, B., Cai, L., Cheng, Y., Ji, Y., Zhang, F., Rosenfeld, D., Liss, P. S., Duce, R. A., Kolb, C. E., and Molina, M. J.: Persistent sulfate formation from London Fog to Chinese haze, *Proc. Natl. Acad. Sci. U. S. A.*, 113, 13630–13635, 2016a.
- Wang, H. B., Zhao, L. J., Xie, Y. J., and Hu, Q. M.: “APEC blue”—The effects and implications of joint pollution prevention and control program, *Sci. Total Environ.*, 553, 429–438, 2016b.
- Wang, H. L., Qiao, L. P., Lou, S. R., Zhou, M., Ding, A. J., Huang, H. Y., Chen, J. M., Wang, Q., Tao, S. K., Chen, C. H., Li, L., and Huang, C.: Chemical composition of PM<sub>2.5</sub> and meteorological impact among three years in urban Shanghai, China, *Journal of Cleaner*

Production, 112, 1302–1311, 2016c.

Wang, P., Cao, J. J., Shen, Z. X., Han, Y. M., Lee, S. C., Huang, Y., Zhu, C. S., Wang, Q. Y., Xu, H. M., and Huang, R. J.: Spatial and seasonal variations of PM<sub>2.5</sub> mass and species during 2010 in Xi'an, China, *Sci. Total Environ.*, 508, 477–487, 2015a.

Wang, Q.Z., Zhuang, G.S., Huang, K., Liu, T. N., Deng, C.R., Xu, J., Lin, Y.F., Guo, Z.G., Chen, Y., Fu, Q.Y., and Fu, J. S.: Probing the severe haze pollution in three typical regions of China: Characteristics, sources and regional impacts, *Atmos. Environ.*, 120, 76–88, 2015b.

Wang, L. T., Wei, Z., Yang, J., Zhang, Y., Zhang, F. F., Su, J., Meng, C. C., and Zhang, Q.: The 2013 severe haze over southern Hebei, China: model evaluation, source apportionment, and policy implications, *Atmos. Chem. Phys.*, 14, 3151–3173, 2014.

Wang, T., Nie, W., Gao, J., Xue, L. K., Gao, X. M., Wang, X. F., Qiu, J., Poon, C. N., Meinardi, S., Blake, D., Wang, S. L., Ding, A. J., Chai, F. H., Zhang, Q. Z., and Wang, W. X.: Air quality during the 2008 Beijing Olympics: secondary pollutants and regional impact, *Atmos. Chem. Phys.*, 10, 7603–7615, 2010.

Wang, M., Zhu, T., Zheng, J., Zhang, R. Y., Zhang, S. Q., Xie, X. X., Han, Y. Q., and Li, Y.: Use of a mobile laboratory to evaluate changes in on-road air pollutants during the Beijing 2008 Summer Olympics, *Atmos. Chem. Phys.*, 9, 8247–8263, 2009a.

Wang, Y. Q., Zhang, X. Y., and Draxler, R.: TrajStat: GIS-based software that uses various trajectory statistical analysis methods to identify potential sources from long-term air pollution measurement data, *Environ. Modell. Softw.*, 24, 938–939, 2009b.

Wu, H., Zhang, Y. F., Han, S. Q., Wu, J. H., Bi, X. H., Shi, G. L., Wang, J., Yao, Q., Cai, Z. Y., Liu, J. L., and Feng, Y. C.: Vertical characteristics of PM<sub>2.5</sub> during the heating season in Tianjin, China, *Sci. Total Environ.*, 523, 152–160, 2015.

Wu, D., Liao, G. L., Deng, X. J., Bi, X. Y., Tan, H. B., Li, F., Jiang, C. L., Xia, D., and Fan, S. J.: Transport condition of surface layer under haze weather over the Pearl River Delta, *Acta. Meteor. Sin.*, 68, 680–688, 2008. (In Chinese).

Yang, L. L., Feng, Y., Jin, W., Li, Y. Q., Zhou, J. B., Jiang, J. B., and Li, Z. G.: Pollution characteristic of water soluble inorganic ion in atmospheric particles in Shijiazhuang, *Adm. Tech. Environ., Monit.*, 26, 17–21, 2016a. (In Chinese).

Yang, H. N., Chen, J., Wen, J. J., Tian, H. Z., and Liu, X. G.: Composition and sources of PM<sub>2.5</sub>

around the heating periods of 2013 and 2014 in Beijing: Implications for efficient mitigation measures, *Atmos. Environ.*, 124, 378–386, 2016b.

Yang, Y., Liu, X. G., Qu, Y., Wang, J. L., An, J. L., Zhang, Y. H. G., and Zhang, F.: Formation mechanism of continuous extreme haze episodes in the megacity Beijing, China, in January 2013, *Atmos. Res.*, 155, 192–203, 2015.

Yao, L., Yang, L. X., Yuan, Q., Yan, C., Dong, C., Meng, C. P., Sui, X., Yang, F., Lu, Y. L., and Wang, W. X.: Sources apportionment of PM<sub>2.5</sub> in a background site in the North China Plain, *Sci. Total Environ.*, 541, 590–598, 2016.

Zhang, X. Y., Wang, L., Wang, W. H., Cao, D. J., and Ye, D. X.: Long-term trend and spatiotemporal variations of haze over China by satellite observations from 1979 to 2013, *Atmos. Environ.*, 119, 362–373, 2015a.

Zhang, L., Wang, T., Lv, M. Y., and Zhang, Q.: On the severe haze in Beijing during January 2013: unraveling the effects of meteorological anomalies with WRF-Chem, *Atmos. Environ.*, 104, 11–21, 2015b.

Zhang, Z. L., Wang, J., Chen, L. H., Chen, X. Y., Sun, G. Y., Zhong, N. S., Kan, H. D., and Lu, W. J.: Impact of haze and air pollution-related hazards on hospital admissions in Guangzhou, China, *Environ. Sci. Pollut. Res. Int.*, 21, 4236–4244, 2014a.

Zhang, J. K., Sun, Y., Liu, Z. R., Ji, D. S., Hu, B., Liu, Q., and Wang, Y. S.: Characterization of submicron aerosols during a month of serious pollution in Beijing, 2013, *Atmos. Chem. Phys.*, 14, 2887–2903, 2014b.

Zhang, T., Cao, J. J., Tie, X. X., Shen, Z. X., Liu, S. X., Ding, H., Han, Y. M., Wang, G. H., Ho, K. F., Qiang, J., and Li, W. T.: Water-soluble ions in atmospheric aerosols measured in Xi'an, China: seasonal variations and sources, *Atmos. Res.*, 102, 110–119, 2011.

Zhang, Q. H., Zhang, J. P., and Xue, H. W.: The challenge of improving visibility in Beijing, *Atmos. Chem. Phys.*, 10, 7821–7827, 2010.

Zhao, B., Wang, P., Ma, J. Z., Zhu, S., Pozzer, A., and Li, W.: A high-resolution emission inventory of primary pollutants for the Huabei region, China, *Atmos. Chem. Phys.*, 12, 481–501, 2012.

Zhao, P. S., Zhang, X. L., and Xu, X. F.: Long-term visibility trends and characteristics in the region of Beijing, Tianjin, and Hebei, China, *Atmos. Res.*, 101, 711–718, 2011.

Zhou, M. G., He, G. J., Fan, M. Y., Wang, Z. X., Liu, Y., Ma, J., Ma, Z. W., Liu, J. M., Liu, Y. N.,



- 933        and Wang, L. D.: Smog episodes, fine particulate pollution and mortality in China, *Environ.*  
934        *Res.*, 136, 396–404, 2015.
- 935        Zhu, L., Huang, X., Shi, H., Cai, X. H., and Song, Y.: Transport pathways and potential sources of  
936        PM<sub>10</sub> in Beijing, *Atmos. Environ.*, 45, 594–604, 2011.

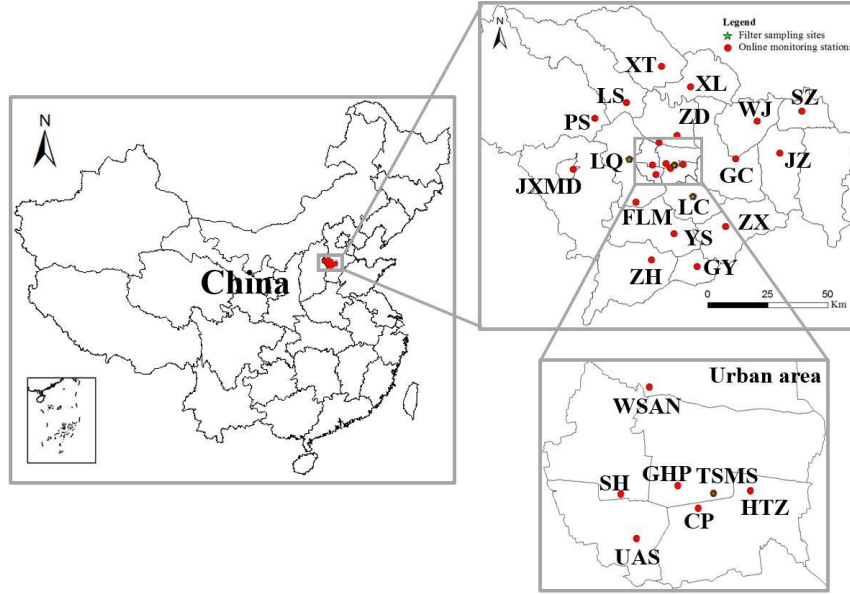

**Fig. 1.** Maps of the online monitoring stations and the filter membrane sampling sites in Shijiazhuang. The 24 online monitoring stations mainly include Twenty-second Middle School (TSMS), Fenglong Mountain (FLM), High-tech Zone (HTZ), Great Hall of the People (GHP), Century Park (CP), Water Source Area in the Northwest (WSAN), University Area in the Southwest (UAS), Staff Hospital (SH), Gaoyi (GY), Gaocheng (GC), Xingtang (XT), Jinzhou (JZ), Jingxing Mining District (JXMD), Lingshou (LS), Luquan (LQ), Luancheng (LC), Pingshan (PS), Shenze (SZ), Wuji (WJ), Xinle (XL), Yuanshi (YS), Zhanhuang (ZH), Zhaoxian (ZX) and Zhengding (ZD). The filter membrane sampling sites are mainly located in TSMS, LQ and LC.

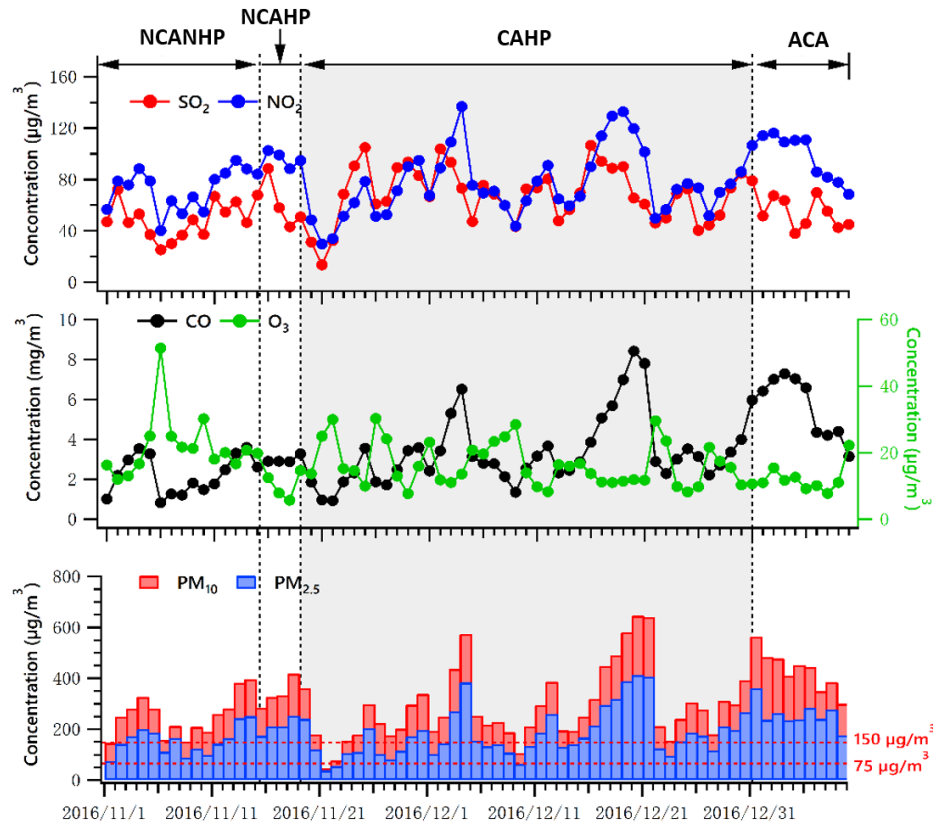

**Fig. 2.** The variations of atmospheric pollutants concentrations during the four stages (NCANHP, NCAHP, CAHP and ACA) of the TECA period in Shijiazhuang.

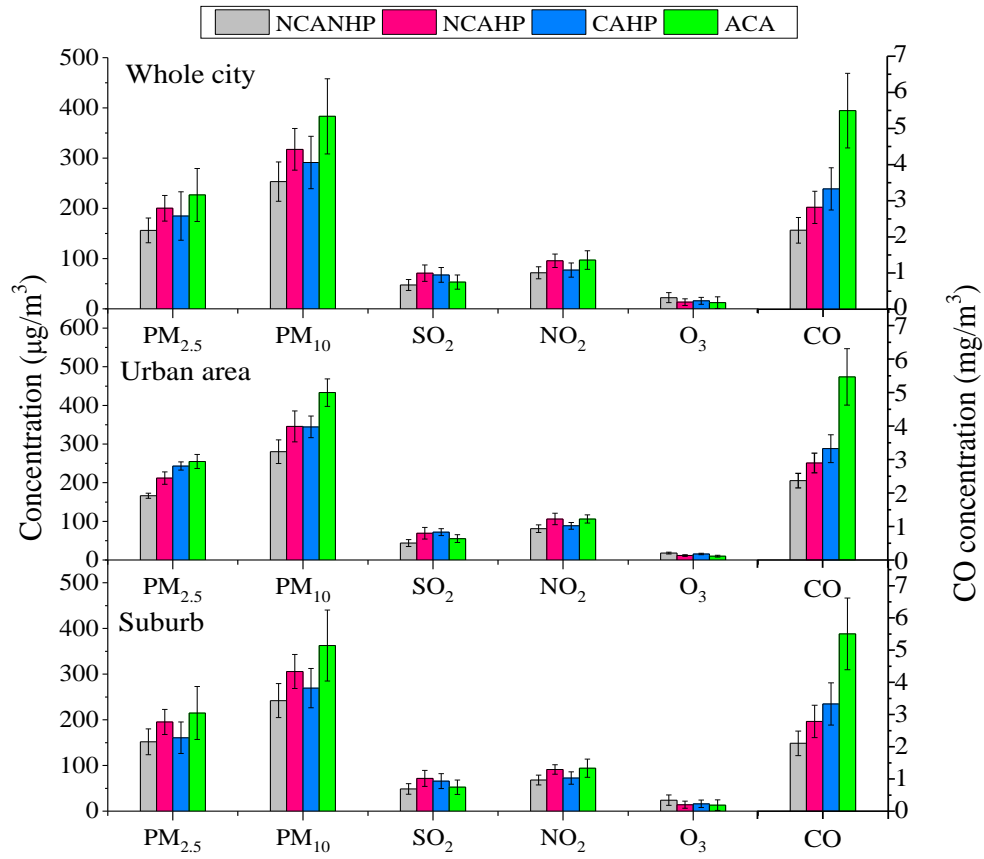

**Fig. 3.** The concentrations variations of  $PM_{2.5}$ ,  $PM_{10}$  and gaseous pollutants during the four stages (NCANHP, NCAHP, CAHP and ACA) of the TECA period in Shijiazhuang. Error bar represented standard deviation.

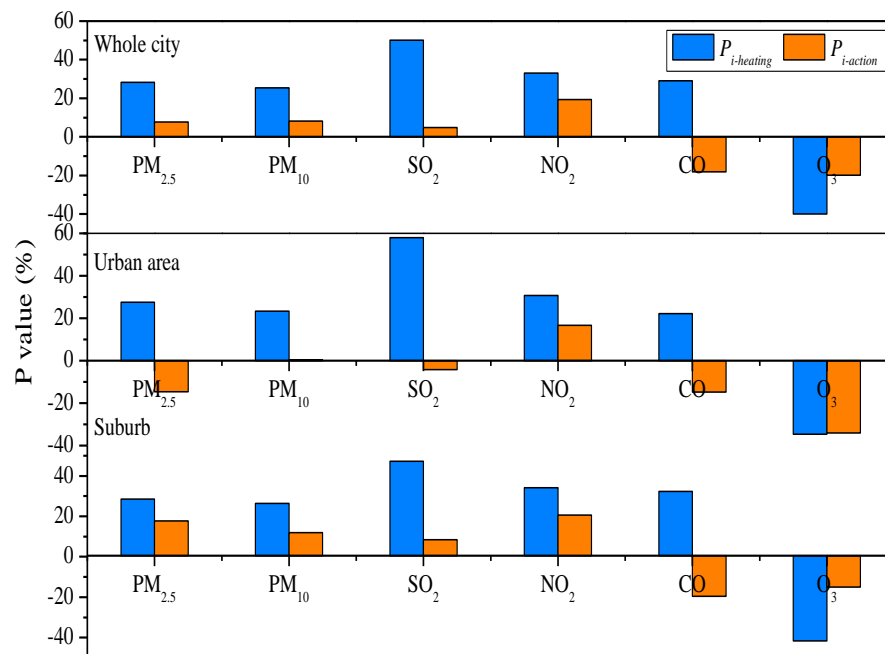

**Fig. 4.** The  $P_{i-heating}$  and  $P_{i-action}$  of  $PM_{2.5}$ ,  $PM_{10}$  and gaseous pollutants ( $SO_2$ ,  $NO_2$ , CO and  $O_3$ ) calculated by equation (8) and (9) in urban area and suburb in Shijiazhuang.

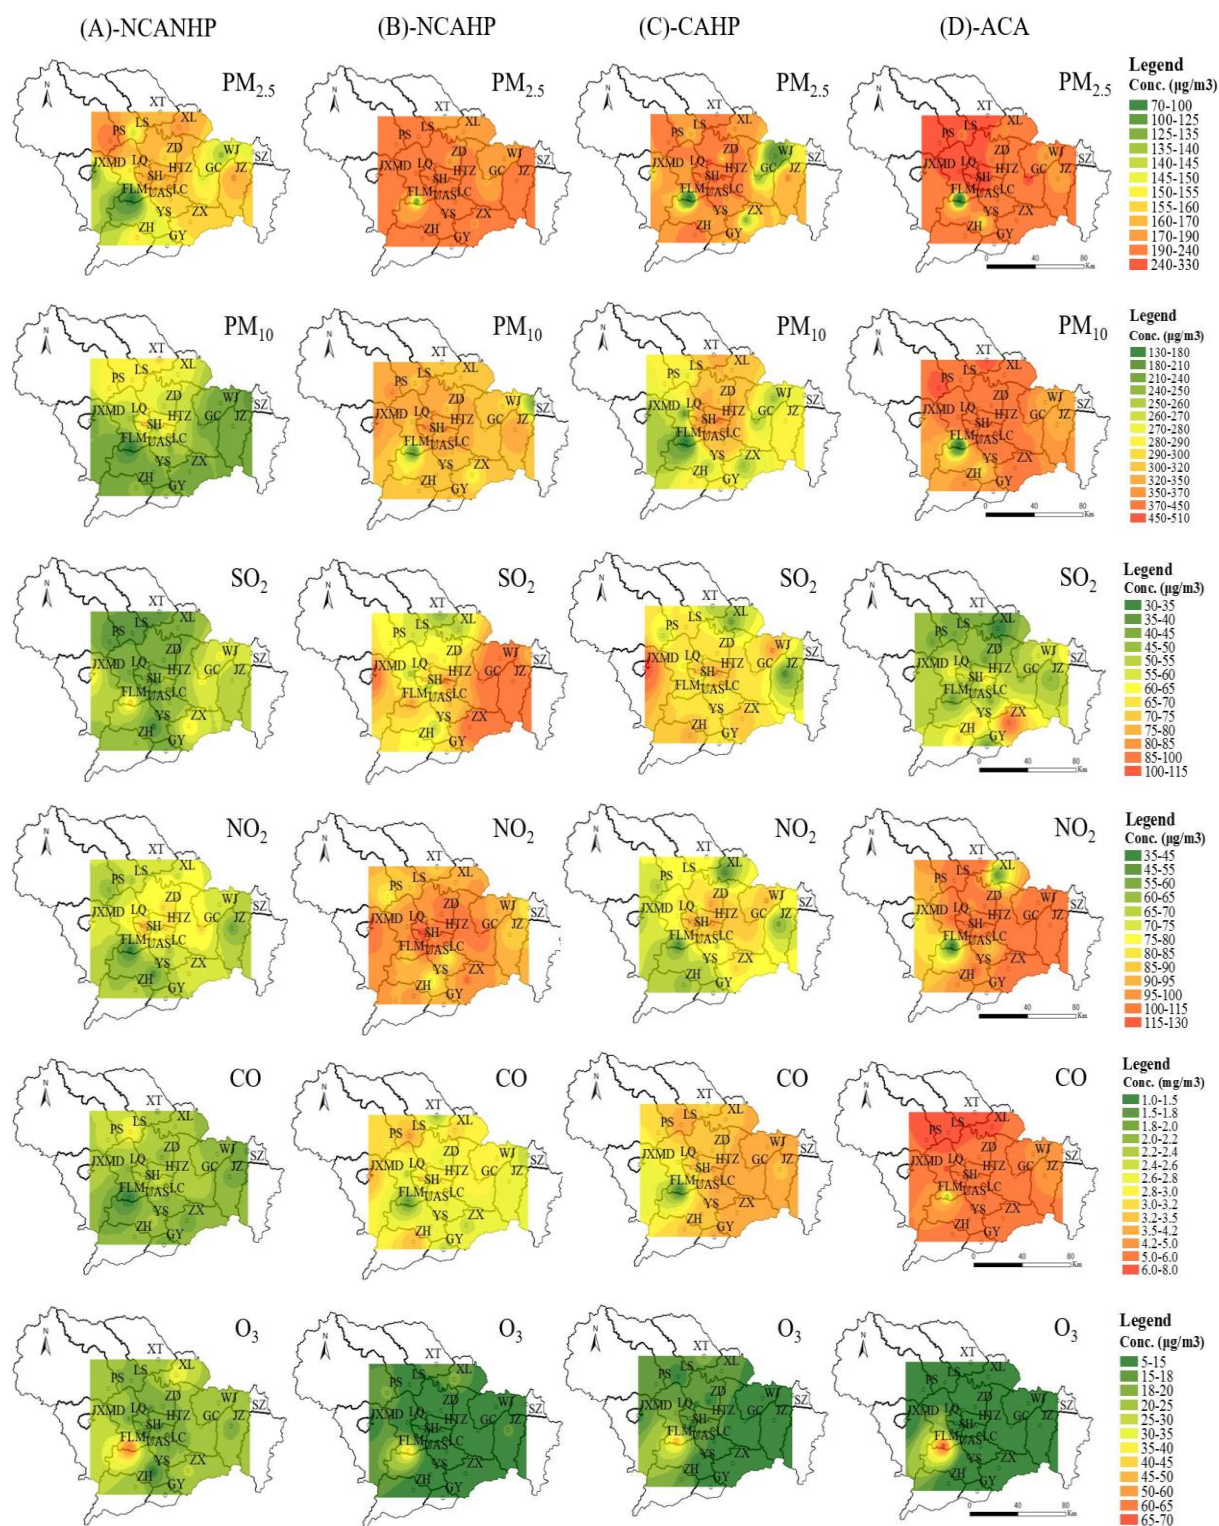

**Fig. 5.** The spatial variations of atmospheric pollutants (PM<sub>2.5</sub>, PM<sub>10</sub>, SO<sub>2</sub>, NO<sub>2</sub>, CO and O<sub>3</sub>) during the four stages (NCANHP, NCAHP, CAHP and ACA) of the TECA period in Shijiazhuang. The pictures were produced by ArcGIS based kriging interpolation method.

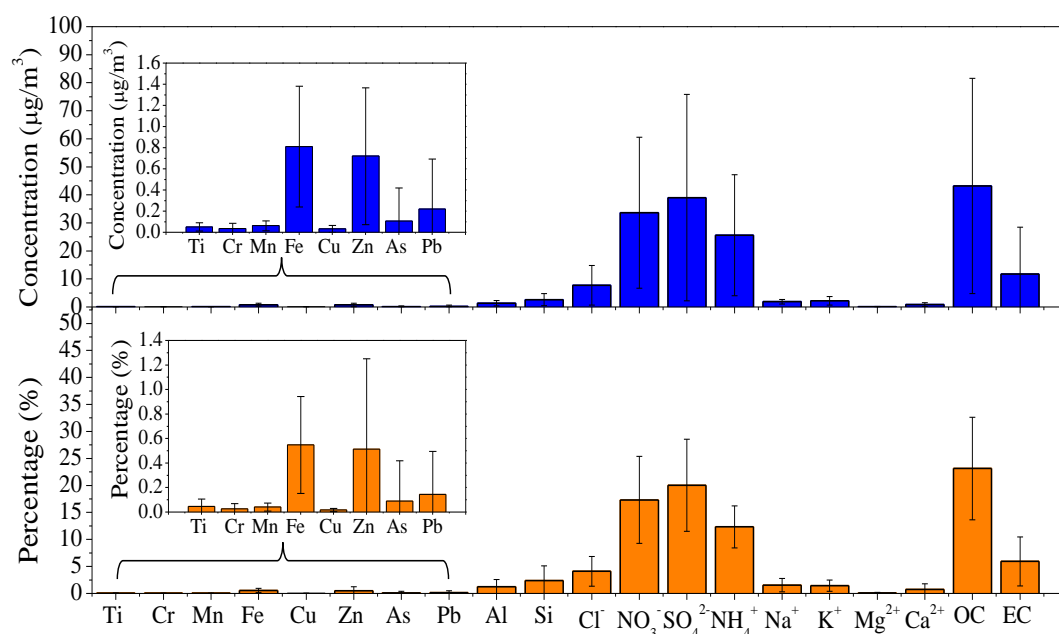

**Fig. 6.** The average concentrations and percentages of chemical species in PM<sub>2.5</sub> in Shijiazhuang during the whole sampling period: November 24, 2015 to January 9, 2017. Error bar represented standard deviation.

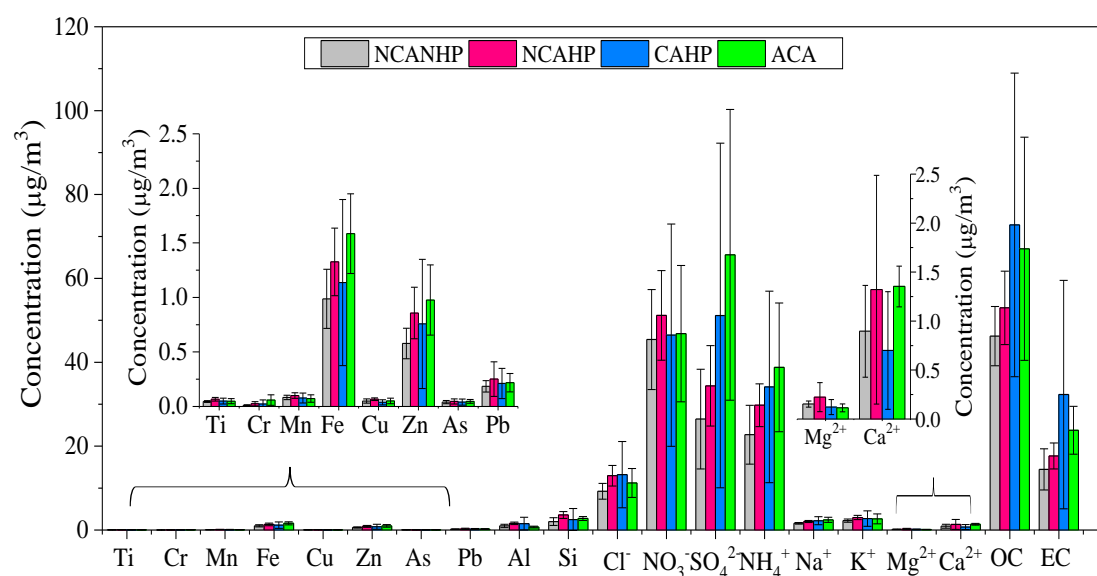

**Fig. 7.** The variations of chemical species in PM<sub>2.5</sub> during the four stages (NCANHP, NCAHP, CAHP and ACA) of the TECA period. Error bar represented standard deviation.

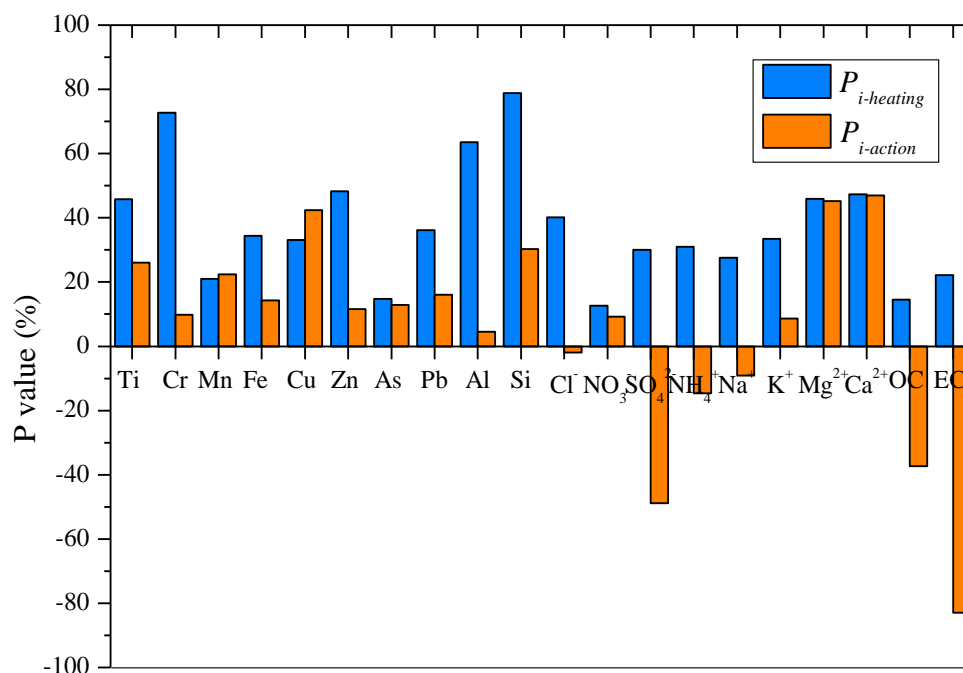

**Fig. 8.** The  $P_{i\text{-heating}}$  and  $P_{i\text{-action}}$  of chemical species in  $PM_{2.5}$  during the TECA period in Shijiazhuang.

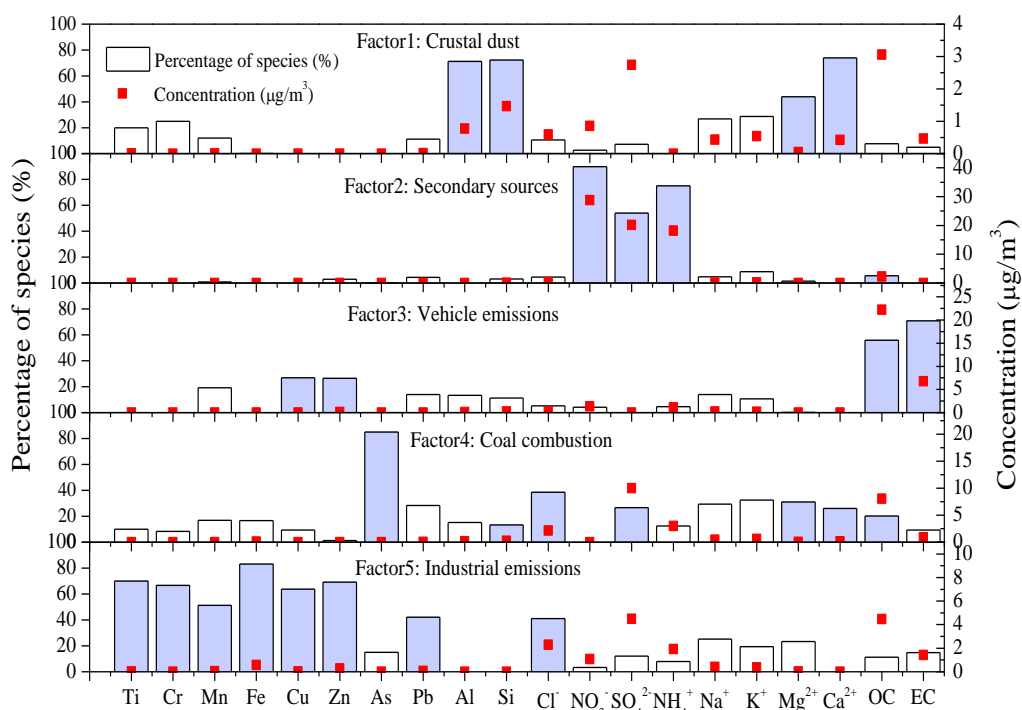

**Fig. 9.** Source profiles obtained with the PMF for  $PM_{2.5}$ . Filled bars identify the species that mainly characterize each factor profile.

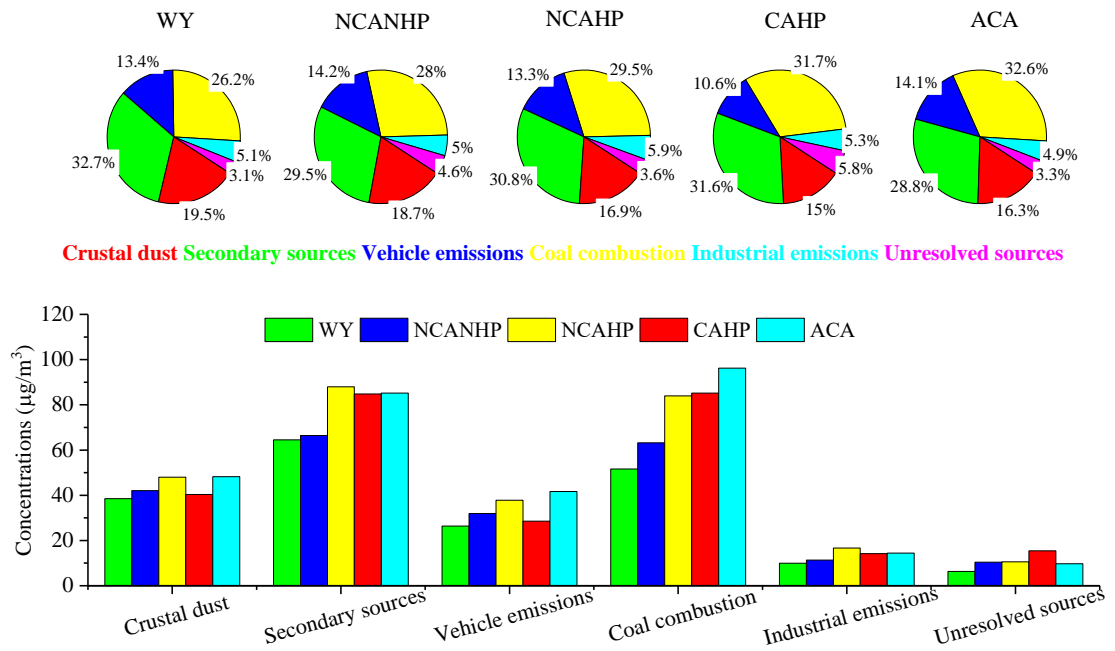

**Fig. 10.** Source contributions of PM<sub>2.5</sub> during different stages in Shijiazhuang. WY represents whole year: November 24, 2015 to January 9, 2017.

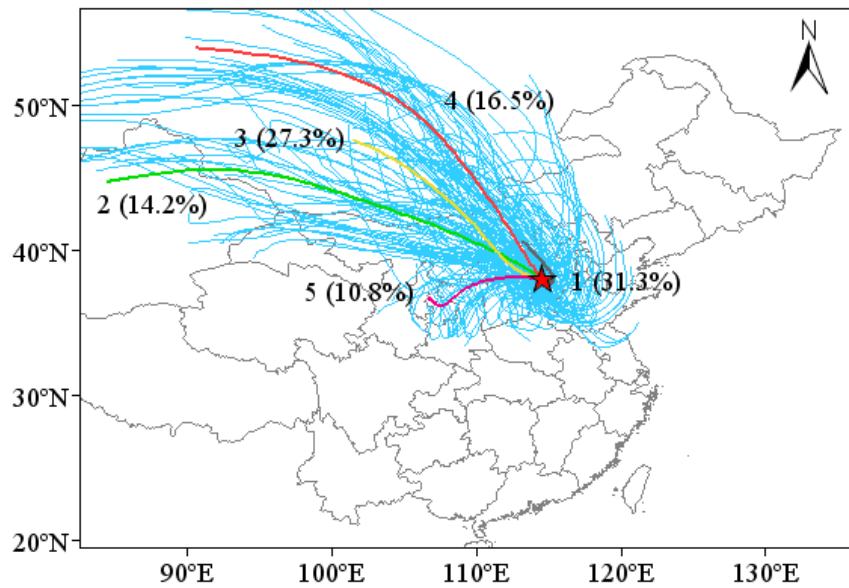

**Fig. 11.** Five clusters of the 72-h air mass backward trajectories during the CAHP. Red star represents Shijiazhuang city.



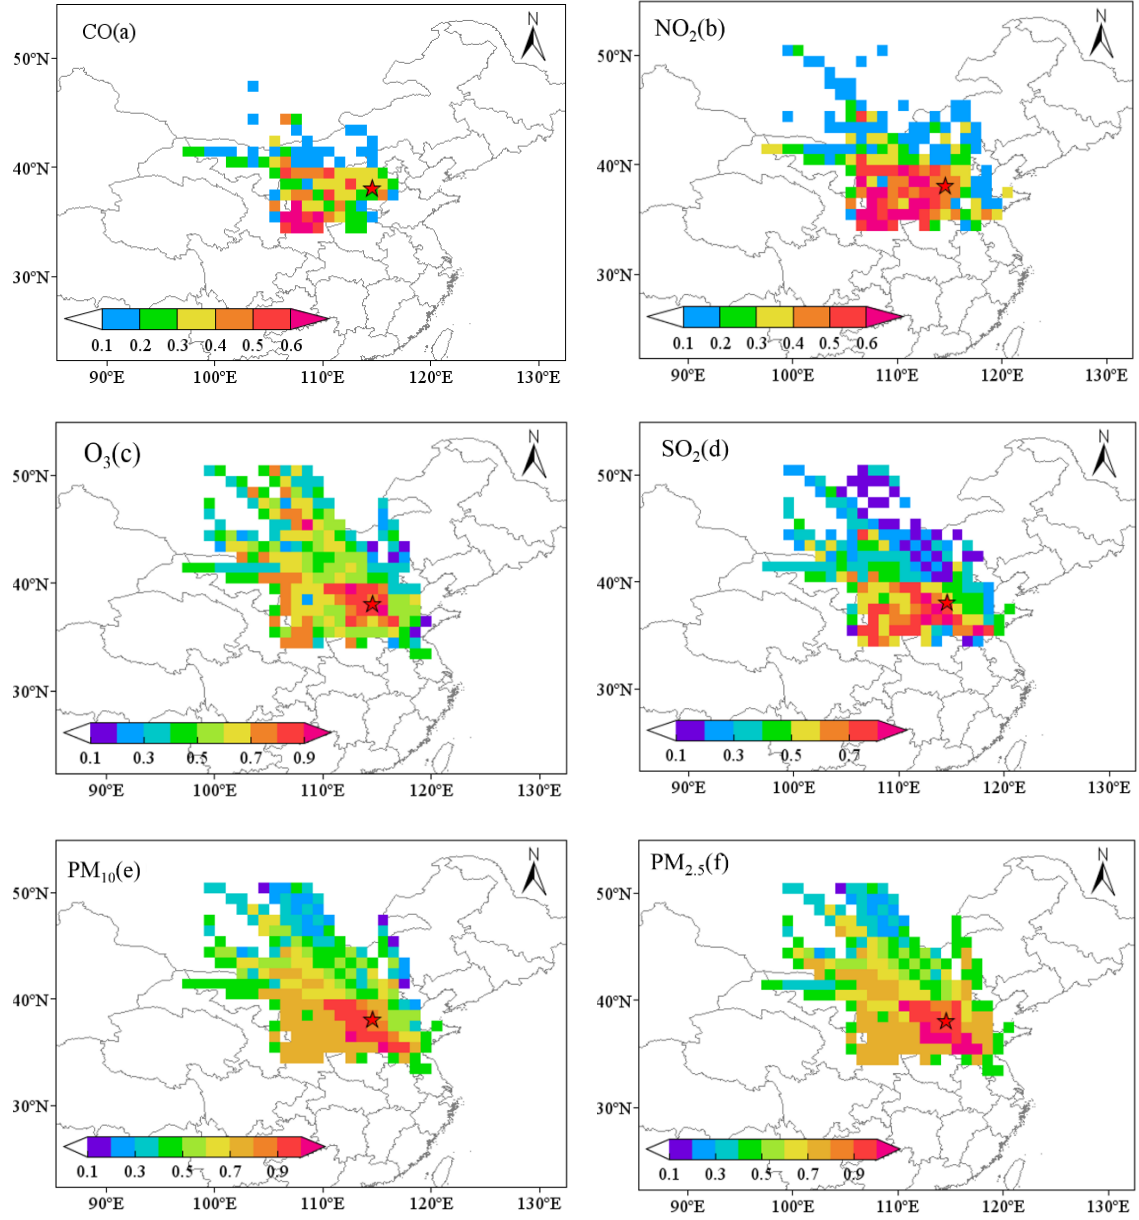

**Fig. 12.** Potential sources areas of atmospheric pollutants obtained from PSCF model during the CAHP. Red star represents Shijiazhuang city. The colors represent potential sources-areas influenced on the atmospheric pollutants, and the red color could be determined to be relatively important sources-areas while the blue color means unimportant potential sources-areas.



**Table 1.** The meteorological conditions during the four stages (NCANHP, NCAHP, CAHP and ACA) of the TECA period in Shijiazhuang.

|                           | NCANHP |      | NCAHP |      | CAHP |      | ACA  |      |
|---------------------------|--------|------|-------|------|------|------|------|------|
|                           | Ave.   | S.D. | Ave.  | S.D. | Ave. | S.D. | Ave. | S.D. |
| Temperature (°C)          | 8.4    | 3.6  | 7.4   | 2.4  | 3.1  | 3.8  | 0.7  | 2.7  |
| Relative humidity (%)     | 77.7   | 17.0 | 73.4  | 15.7 | 71.5 | 18.0 | 83.3 | 18.1 |
| Wind speed (m/s)          | 0.7    | 1.2  | 0.6   | 0.6  | 0.4  | 1.0  | 0.5  | 1.1  |
| Height of mixed layer (m) | 540    | 144  | 590   | 274  | 474  | 299  | 431  | 360  |

Ave. represents average value, S.D. represents standard deviation. NCANHP represents the no control action and no heating period, NCAHP represents the no control action and heating period, CAHP represents the control action and heating period, and ACA represents after control action.

**Table 2.** The average concentrations of atmospheric pollutants in different clusters during the CAHP.

| Clusters | Probability of occurrence (%) | Atmospheric Pollutants ( $\mu\text{g}/\text{m}^3$ ) |                 |                |                        |                  |                   |
|----------|-------------------------------|-----------------------------------------------------|-----------------|----------------|------------------------|------------------|-------------------|
|          |                               | SO <sub>2</sub>                                     | NO <sub>2</sub> | O <sub>3</sub> | CO(mg/m <sup>3</sup> ) | PM <sub>10</sub> | PM <sub>2.5</sub> |
| 1        | 31.3                          | 68                                                  | 88              | 14             | 3.9                    | 358              | 237               |
| 2        | 14.2                          | 67                                                  | 78              | 24             | 3.0                    | 290              | 181               |
| 3        | 27.3                          | 65                                                  | 69              | 20             | 2.8                    | 232              | 152               |
| 4        | 16.5                          | 50                                                  | 58              | 27             | 2.1                    | 189              | 119               |
| 5        | 10.8                          | 83                                                  | 104             | 16             | 4.8                    | 451              | 303               |
